# Supplementary material for: Oleic Acid-Containing Phosphatidylinositol Is a Blood Biomarker Candidate for SPG28
Source: MDPI journal article supplement (doi:10.3390/biomedicines11041092), 2023-04-04
Supplement: s1 [file s1]

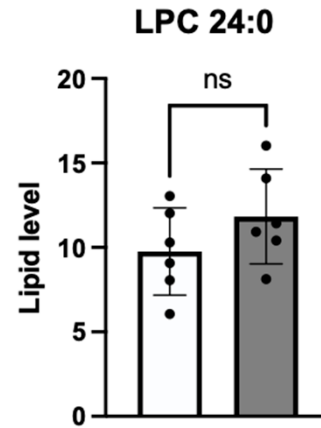

**Figure S1.** LPC 24:0 in plasma from mice. *Ddhdl*(+/+) mice and *Ddhdl*(-/-) mice are shown in opened and filled columns, respectively. The unit of the vertical axis is pmol/mg. Error bars indicate mean  $\pm$  SD. ns: not significant. All data were analyzed by Student's t-test.

Figure S1
