# Supplementary material for: Oleic Acid-Containing Phosphatidylinositol Is a Blood Biomarker Candidate for SPG28
Source: Biomedicines. 2023 Apr 4;11(4):1092. doi: 10.3390/biomedicines11041092 (PMC10136216; doi:10.3390/biomedicines11041092)
Supplement: Supplementary file 1 [file biomedicines-11-01092-s001.zip]

Archive with 11 entries (11 files):
- Supplementary Figure S1.pdf
- Supplementary Table S10_230226.xlsx
- Supplementary Table S1_220901.xlsx
- Supplementary Table S2_220901.xlsx
- Supplementary Table S3_230226.xlsx
- Supplementary Table S4_220901.xlsx
- Supplementary Table S5_220901.xlsx
- Supplementary Table S6_220901.xlsx
- Supplementary Table S7_230226.xlsx
- Supplementary Table S8_230226.xlsx
- Supplementary Table S9_230226.xlsx
