# Supplementary material for: Oleic Acid-Containing Phosphatidylinositol Is a Blood Biomarker Candidate for SPG28
Source: Biomedicines. 2023 Apr 4;11(4):1092. doi: 10.3390/biomedicines11041092 (PMC10136216; doi:10.3390/biomedicines11041092)
Supplement: Supplementary file 1 [file biomedicines-11-01092-s001.zip › Supplementary Table S1_220901.xlsx]

## Sheet: Table S1
	Table S1. PCs detected in mouse plasma
	PCs	Formula	Exact Mass	Precursor-ion	Product-ion	MRM transition Quan	RT (min)	Ddhd1(+/+)							Ddhd1(+/−)							Ddhd1(−/−)
								#1	#2	#3	#4	#5	#6	Average	#1	#2	#3	#4	#5	#6	Average	#1	#2	#3	#4	#5	#6	Average
	PC 16:1/16:1	C40H76N1O8P1	729.531	[M + CH3COO]-	[Acyl FA - H]-	788.55>253.2	7.86±0.07	4.12699	6.74587	13.984	20.8863	6.4882	26.9957	13.2045	4.94421	6.04102	11.8352	18.3564	28.4405	10.7967	13.4023	4.97981	25.4595	22.8637	13.1202	14.6026	11.6847	15.4518
	PC 16:1/16:0	C40H78N1O8P1	731.547	[M + CH3COO]-	[Acyl FA - H]-	790.55>253.2	7.67±0	41.9508	46.5594	104.427	145.433	34.843	132.799	84.3353	51.4272	39.1479	57.3715	155.449	190.238	64.2205	92.9757	31.522	203.03	200.528	106.392	88.1451	69.4736	116.515
	PC 16:0/16:0	C40H80N1O8P1	733.562	[M + CH3COO]-	[Acyl FA - H]-	792.6>255.25	7.6±0	502.446	401.138	557.607	682.119	519.359	622.155	547.471	550.148	519.121	688.792	935.726	670.65	374.906	623.224	522.552	850.156	688.135	672.196	784.649	583.134	683.47
	PC 16:0/17:0	C41H82N1O8P1	747.578	[M + CH3COO]-	[Acyl FA - H]-	806.6>255.25	7.56±0	376.885	390.557	472.743	539.206	389.431	562.546	455.228	386.158	385.142	545.85	683.443	752.283	396.73	524.934	428.491	930.817	518.583	547.772	653.254	495.977	595.815
	PC 16:1/17:1	C41H78N1O8P1	743.547	[M + CH3COO]-	[Acyl FA - H]-	802.55>253.2	7.72±0.18	4.58599	5.19493	13.1044	16.1108	6.04967	19.8036	10.8082	5.02962	8.53418	10.8583	17.3836	18.7594	9.63965	11.7008	5.88516	24.1327	18.7057	12.9051	11.5884	10.7185	13.9893
	PC 16:0/17:1	C41H80N1O8P1	745.562	[M + CH3COO]-	[Acyl FA - H]-	804.6>255.25	7.54±0.01	239.773	175.971	250.519	418.562	274.31	344.801	283.989	263.041	254.01	318.727	392.734	366.718	170.317	294.258	204.118	487.633	422.192	310.797	397.239	284.825	351.134
	PC 16:0/18:3	C42H78N1O8P1	755.547	[M + CH3COO]-	[Acyl FA - H]-	814.55>255.25	7.76±0.01	29.5268	29.3967	43.2858	72.9499	27.0992	59.3205	43.5965	22.9374	27.911	53.7655	53.2619	55.3429	28.8488	40.3446	21.0087	57.5694	61.2736	47.1148	49.9651	28.2988	44.2051
	PC 15:0/18:2	C41H78N1O8P1	743.547	[M + CH3COO]-	[Acyl FA - H]-	802.55>241.2	7.72±0.01	5.42694	7.05692	10.731	15.7607	9.73327	14.3824	10.5152	4.43327	4.21963	11.8358	18.3581	17.6859	8.94691	10.9133	3.07856	12.5976	13.5712	18.0706	23.1822	20.3831	15.1472
	PC 16:1/18:2	C42H78N1O8P1	755.547	[M + CH3COO]-	[Acyl FA - H]-	814.55>253.2	7.78±0	27.5266	34.7448	79.7995	129.578	34.7436	143.669	75.0103	37.7036	28.7826	52.1457	137.104	178.063	62.9707	82.7949	34.608	137.455	91.5608	111.086	99.9372	84.0285	93.1126
	PC 16:0/18:2	C42H80N1O8P1	757.562	[M + CH3COO]-	[Acyl FA - H]-	816.6>255.25	7.72±0	1194.51	1319.77	1821.04	3147.11	1545.2	3033.97	2010.27	1220.79	1311.19	1954.36	3157.67	3734.15	1251.51	2104.94	1159.64	3634.38	2890.37	2241.55	3226.53	2631.23	2630.62
	PC 17:0/18:2	C43H82N1O8P1	771.578	[M + CH3COO]-	[Acyl FA - H]-	830.6>269.25	7.69±0	28.5236	28.781	43.655	57.023	28.3333	55.4448	40.2934	26.6935	25.0357	43.2377	80.0646	59.3026	31.7104	44.3408	32.9733	75.5039	36.0784	35.3951	49.8564	52.4773	47.0474
	PC 17:1/18:2	C43H80N1O8P1	769.562	[M + CH3COO]-	[Acyl FA - H]-	828.6>267.25	7.76±0	5.19767	11.4779	15.2179	15.4068	5.96235	19.2521	12.0858	7.33184	10.55	11.2943	31.375	31.6764	17.9732	18.3668	10.6853	28.6484	18.4629	20.5469	27.3648	22.3138	21.337
	PC 18:3/18:2	C44H78N1O8P1	779.547	[M + CH3COO]-	[Acyl FA - H]-	838.55>277.2	7.89±0.01	7.03274	11.2449	16.0126	43.8844	7.19045	41.5064	21.1452	12.7048	12.0836	8.7955	38.8013	34.9018	18.7457	21.0054	7.60678	36.4768	29.5943	28.9438	36.6388	33.0453	28.7176
	PC 18:2/18:2	C44H80N1O8P1	781.562	[M + CH3COO]-	[Acyl FA - H]-	840.6>279.25	7.82±0	232.308	359.319	549.95	659.636	360.615	684.663	474.415	277.833	210.861	401.1	805.794	790.931	523.892	501.735	381.305	617.206	553.982	543.863	745.327	777.846	603.255
	PC 15:0/18:1	C41H80N1O8P1	745.562	[M + CH3COO]-	[Acyl FA - H]-	804.6>241.2	7.66±0.01	2.59868	5.19524	7.65171	14.9374	3.59505	8.62919	7.10121	3.83657	1.1506	5.21212	13.7365	11.2315	5.78391	6.82519	4.88963	12.2001	7.8249	8.17323	7.53304	8.69163	8.21876
	PC 16:1/18:1	C42H80N1O8P1	757.562	[M + CH3COO]-	[Acyl FA - H]-	816.6>253.2	7.71±0.01	19.4177	26.5267	57.6075	87.4167	18.7664	75.0597	47.4658	28.1445	27.3351	35.2973	88.6353	90.9883	37.4945	51.3158	27.4418	95.3889	81.4553	59.2834	48.3459	47.9218	59.9728
	PC 16:0/18:1	C42H82N1O8P1	759.578	[M + CH3COO]-	[Acyl FA - H]-	818.6>255.25	7.64±0	908.969	669.818	1065.62	1886.05	985.954	1676.53	1198.82	1028.53	975.764	1123.12	2177.13	2216.35	786.623	1384.59	807.427	2140.12	2072.07	1767.43	1645.87	1329.62	1627.09
	PC 17:0/18:1	C43H84N1O8P1	773.593	[M + CH3COO]-	[Acyl FA - H]-	832.6>269.25	7.63±0.02	14.3707	17.8388	20.9192	30.6981	19.8041	26.5566	21.6979	20.9765	17.169	28.2369	44.7454	36.2133	17.4315	27.4621	16.1184	42.4156	31.9157	23.5556	27.0066	28.7827	28.2991
	PC 18:3/18:1	C44H80N1O8P1	781.562	[M + CH3COO]-	[Acyl FA - H]-	840.6>277.2	7.81±0.01	4.20372	12.3303	14.426	19.7589	8.06699	16.817	12.6005	6.22352	6.13729	17.2673	18.3579	28.5607	16.198	15.4574	8.96535	25.5961	17.3625	16.9936	17.9641	12.265	16.5244
	PC 18:2/18:1	C44H82N1O8P1	783.578	[M + CH3COO]-	[Acyl FA - H]-	842.6>279.25	7.76±0	795.833	988.764	1140.47	1406.42	1051.96	1311.18	1115.77	875.917	780.643	1185.31	1498.45	1841.32	1184.73	1227.73	1053.34	1795.6	1432.19	983.575	1521.57	1586.57	1395.47											#NUM!	0.00782357	0.00563111
	PC 18:1/18:1	C44H84N1O8P1	785.593	[M + CH3COO]-	[Acyl FA - H]-	844.6>281.25	7.68±0.01	209.521	268.452	369.174	501.763	326.552	394.47	344.989	297.034	293.771	332.149	558.855	509.178	319.547	385.089	365.575	489.02	460.007	342.67	459.277	387.78	417.388
	PC 16:0/18:0	C42H84N1O8P1	761.593	[M + CH3COO]-	[Acyl FA - H]-	820.6>255.25	7.59±0	198.475	189.659	236.275	340.924	274.331	323.53	260.532	272.209	262.767	276.021	458.472	418.361	162.286	308.353	229.152	391.404	364.649	286.528	316.9	272.941	310.262
	PC 18:3/18:0	C44H82N1O8P1	783.578	[M + CH3COO]-	[Acyl FA - H]-	842.6>277.2	7.73±0.01	10.6254	11.7099	11.5215	22.1122	13.153	16.1545	14.2127	12.4486	12.0838	18.8956	20.9104	19.8363	9.17715	15.5586	14.4885	23.3401	17.6069	16.0265	11.3574	10.9128	15.622
	PC 18:2/18:0	C44H84N1O8P1	785.593	[M + CH3COO]-	[Acyl FA - H]-	844.6>279.25	7.69±0	1886.1	1897.77	2828.41	3568.79	3134.06	3537.89	2808.84	2922.97	2551.74	3105.96	4871.36	4029.49	1678.49	3193.33	2456.93	3908.87	3664.83	3153.16	3945.82	2707.91	3306.25
	PC 18:1/18:0	C44H86N1O8P1	787.609	[M + CH3COO]-	[Acyl FA - H]-	846.6>281.25	7.61±0	484.115	418.92	569.666	951.506	689.043	778.221	648.579	788.857	819.427	711.756	1092.45	1061.74	393.799	811.338	595.045	993.528	1065.37	819.58	715.508	669.252	809.713
	PC 18:0/18:0	C44H88N1O8P1	789.625	[M + CH3COO]-	[Acyl FA - H]-	848.65>283.25	7.59±0.01	77.0289	53.9187	84.3869	106.804	99.7279	86.8447	84.7851	113.55	114.523	89.0984	133.386	129.297	50.7646	105.103	91.177	118.887	142.797	105.896	116.359	76.5073	108.604
	PC 18:2/19:0	C45H86N1O8P1	799.609	[M + CH3COO]-	[Acyl FA - H]-	858.6>279.25	7.75±0.01	197.841	225.297	358.784	352.474	209.696	321.099	277.532	199.088	189.802	321.465	518.549	445.723	303.01	329.606	238.125	476.97	306.243	326.608	380.805	359.097	347.975
	PC 18:1/19:0	C45H88N1O8P1	801.625	[M + CH3COO]-	[Acyl FA - H]-	860.65>281.25	7.62±0.05	72.7179	92.2574	126.927	130.694	81.4966	121.292	104.231	78.4162	92.8755	108.859	166.789	141.671	84.1119	112.12	105.447	136.519	124.182	103.676	116.53	129.784	119.356
	PC 16:0/19:1	C43H84N1O8P1	773.593	[M + CH3COO]-	[Acyl FA - H]-	832.6>255.25	7.72±0.01	315.516	236.389	424.61	660.445	353.201	562.978	425.523	319.302	277.221	320.759	588.007	612.673	304.562	403.754	253.609	632.894	464.184	478.314	558.356	521.878	484.873											0.00308578	0.00782357	0.00563111
	PC 18:2/19:1	C45H84N1O8P1	797.593	[M + CH3COO]-	[Acyl FA - H]-	856.6>279.25	7.82±0	64.2383	97.8438	155.726	155.657	90.107	162.398	120.995	85.487	69.751	108.649	180.243	205.455	123.522	128.851	91.2361	186.725	139.604	126.025	234.97	194.275	162.139
	PC 18:1/19:1	C45H86N1O8P1	799.609	[M + CH3COO]-	[Acyl FA - H]-	858.6>281.25	7.75±0	61.9521	82.8107	86.377	134.413	92.4101	131.269	98.2053	81.221	64.837	109.018	160.58	160.466	101.252	112.895	78.0322	113.464	116.637	75.7548	127.05	132.553	107.248
	PC 18:0/19:1	C45H88N1O8P1	801.625	[M + CH3COO]-	[Acyl FA - H]-	860.65>283.25	7.68±0	116.285	115.609	147.006	216.448	161.179	193.532	158.343	160.712	158.769	157.966	249.647	276.286	112.726	186.018	127.723	215.589	223.472	166.259	185.645	133.403	175.349
	PC 16:1/20:5	C44H76N1O8P1	777.531	[M + CH3COO]-	[Acyl FA - H]-	836.55>253.2	7.89±0.01	5.19783	8.29743	17.5058	19.6425	3.33204	18.9218	12.1496	5.54158	3.54806	13.1404	24.4143	21.0332	9.7951	12.9121	4.98035	21.3524	20.789	10.1094	8.92401	6.47025	12.1042
	PC 16:0/20:5	C44H78N1O8P1	779.547	[M + CH3COO]-	[Acyl FA - H]-	838.55>255.25	7.81±0	199.458	237.423	336.595	495.472	203.324	432.604	317.48	268.351	227.721	269.231	507.448	585.401	263.116	353.544	214.594	506.61	492.356	355.354	357.135	328.337	375.731
	PC 18:2/20:5	C46H78N1O8P1	803.547	[M + CH3COO]-	[Acyl FA - H]-	862.55>279.25	7.93±0	59.7312	104.431	135.573	182.534	75.6297	210.999	128.15	98.3473	88.2369	111.729	236.673	214.504	109.776	143.211	87.3939	209.462	201.488	129.229	196.346	160.133	164.009
	PC 18:1/20:5	C46H80N1O8P1	805.562	[M + CH3COO]-	[Acyl FA - H]-	864.6>281.25	7.86±0	54.6917	72.9843	106.573	113.608	60.2938	112.894	86.8409	84.853	74.8205	76.0662	123.895	153.17	83.0049	99.3016	101.719	130.97	136.849	92.1662	82.2273	91.9403	105.979
	PC 18:0/20:5	C46H82N1O8P1	807.578	[M + CH3COO]-	[Acyl FA - H]-	866.6>283.25	7.79±0	125.734	111.508	161.018	219.439	166.102	174.012	159.636	171.679	172.372	140.874	219.648	232.994	107.421	174.165	138.414	210.659	259.323	152.385	142.988	117.201	170.162
	PC 19:0/20:5	C47H84N1O8P1	821.593	[M + CH3COO]-	[Acyl FA - H]-	880.6>297.3	7.83±0	19.114	11.7876	20.8513	37.531	28.6868	33.5321	25.2504	18.5887	21.7751	22.1554	40.8615	29.5193	17.5888	25.0815	15.7579	37.1394	32.4081	28.7225	32.116	21.5398	27.9473
	PC 20:5/20:5	C48H76N1O8P1	825.531	[M + CH3COO]-	[Acyl FA - H]-	884.55>301.2	8±0.08	1.1465	3.72183	7.12426	8.58513	2.89315	6.96954	5.0734	3.32478	3.16414	2.49706	11.184	7.64671	1.61959	4.90604	1.44857	5.30377	16.1156	4.62436	4.86699	4.63529	6.16576
	PC 16:0/20:4	C44H80N1O8P1	781.562	[M + CH3COO]-	[Acyl FA - H]-	840.6>255.25	7.75±0	232.019	196.444	332.345	359.503	333.385	395.894	308.265	305.359	321.465	330.562	491.226	334.237	218.899	333.625	217.116	404.138	374.731	305.601	364.022	257.11	320.453
	PC 17:0/20:4	C45H82N1O8P1	795.578	[M + CH3COO]-	[Acyl FA - H]-	854.6>269.25	7.74±0.02	7.10886	7.52165	5.01303	5.05673	9.82147	10.5105	7.50537	5.20061	3.64356	11.0759	12.4002	5.25758	3.00739	6.76419	4.43677	10.2111	9.53731	6.56031	8.11288	4.8284	7.28113
	PC 18:2/20:4	C46H80N1O8P1	805.562	[M + CH3COO]-	[Acyl FA - H]-	864.6>279.25	7.88±0.02	38.9228	51.5188	69.8516	90.8588	48.4267	101.215	66.799	56.9123	48.8956	66.4929	91.9655	83.8151	54.0189	67.0167	58.8023	75.9865	100.471	60.6918	111.716	94.3631	83.6718
	PC 18:1/20:4	C46H82N1O8P1	807.578	[M + CH3COO]-	[Acyl FA - H]-	866.6>281.25	7.78±0	55.0716	54.0055	60.7313	68.2911	80.8424	80.3844	66.5544	83.2837	73.813	98.9195	86.4859	70.5357	60.6459	78.9473	84.1088	76.4189	74.6257	47.6609	82.9946	83.43	74.8732
	PC 18:0/20:4	C46H84N1O8P1	809.593	[M + CH3COO]-	[Acyl FA - H]-	868.6>283.25	7.72±0	156.854	103.122	118.3	147.06	204.429	145.3	145.844	213.844	269.793	186.185	214.779	160.109	85.3228	188.339	147.519	149.497	222.651	107.537	148.824	107.72	147.291
	PC 20:4/20:4	C48H80N1O8P1	829.562	[M + CH3COO]-	[Acyl FA - H]-	888.6>303.25	7.92±0.02	5.4271	3.95473	7.30013	10.584	5.96288	9.29353	7.08706	5.96796	7.48081	5.32068	7.29425	6.09362	6.0157	6.36217	4.61766	7.1607	16.874	4.08608	10.8943	8.9813	8.76901
	PC 16:0/20:3	C44H82N1O8P1	783.578	[M + CH3COO]-	[Acyl FA - H]-	842.6>255.25	7.74±0	129.383	82.2976	138.464	173.73	164.883	200.939	148.283	135.435	155.487	187.193	201.337	148.655	110.456	156.427	109.556	187.913	219.566	137.426	183.781	149.43	164.612
	PC 18:2/20:3	C46H82N1O8P1	807.578	[M + CH3COO]-	[Acyl FA - H]-	866.6>279.25	7.86±0.01	17.4296	24.5097	40.7411	44.3507	30.0664	58.8885	35.9977	24.2179	21.1006	31.4959	49.0083	48.1643	35.1819	34.8615	27.7147	36.607	39.7472	32.2708	56.5793	44.0568	39.496
	PC 18:1/20:3	C46H84N1O8P1	809.593	[M + CH3COO]-	[Acyl FA - H]-	868.6>281.25	7.77±0	35.1032	21.7344	30.5129	32.2318	33.1576	48.92	33.61	32.5814	36.455	51.0674	41.7585	40.5216	33.4115	39.2992	34.9695	42.4493	37.7901	24.5244	49.0448	34.8173	37.2659
	PC 18:0/20:3	C46H86N1O8P1	811.609	[M + CH3COO]-	[Acyl FA - H]-	870.6>283.25	7.71±0	74.112	44.6022	57.9049	72.1412	97.0302	83.4869	71.5463	110.597	114.809	69.0032	92.5895	65.6165	37.4233	81.6731	66.6115	87.7175	114.752	59.0778	74.2783	63.1122	77.5915
	PC 20:4/20:3	C48H82N1O8P1	831.578	[M + CH3COO]-	[Acyl FA - H]-	890.6>303.25	7.89±0.02	3.36291	2.63607	5.27702	5.29142	4.8228	7.08082	4.74517	4.68865	5.84945	4.66884	4.86307	3.94247	3.4705	4.5805	6.06695	6.36522	8.80286	3.76371	5.79445	5.98747	6.13011
	PC 20:3/20:3	C48H84N1O8P1	833.593	[M + CH3COO]-	[Acyl FA - H]-	892.6>305.25	7.88±0.02	0.458537	0.620253	3.34202	0.58791	1.31507	1.54859	1.31206	2.13139	0.958832	1.30281	3.88949	3.70353	1.46522	2.24188	1.26749	1.59097	1.95592	0.107528	3.24497	1.73821	1.65085
	PC 16:0/20:2	C44H84N1O8P1	785.593	[M + CH3COO]-	[Acyl FA - H]-	844.6>255.25	7.72±0.01	24.2346	20.4758	25.8638	40.5853	27.6265	43.5831	30.3948	24.8157	27.1449	36.7591	44.5069	35.8561	22.9122	31.9991	20.3779	37.2967	39.0152	25.5995	40.3408	27.587	31.7028
	PC 18:2/20:2	C46H84N1O8P1	809.593	[M + CH3COO]-	[Acyl FA - H]-	868.6>279.25	7.8±0	19.1126	25.3643	38.276	47.8801	21.8382	59.9891	35.41	23.1978	20.6226	52.2595	53.7537	64.3236	60.7708	45.8213	36.7843	59.0354	38.5228	33.3476	69.24	58.5617	49.2486
	PC 18:1/20:2	C46H86N1O8P1	811.609	[M + CH3COO]-	[Acyl FA - H]-	870.6>281.25	7.76±0.01	7.18452	10.2356	14.0737	11.5247	8.76906	13.3862	10.8623	8.7818	7.19258	10.5328	11.4271	9.67911	8.17505	9.29807	8.33088	12.5976	10.0258	8.17366	15.7627	11.1067	10.9996
	PC 16:0/20:1	C44H86N1O8P1	787.609	[M + CH3COO]-	[Acyl FA - H]-	846.6>255.25	7.61±0.01	26.2196	25.5158	26.829	38.3423	26.1318	40.7396	30.6297	20.462	22.9207	41.4872	48.999	47.1342	24.2184	34.2036	14.7591	56.369	30.9358	31.512	41.3792	29.2643	34.0366
	PC 18:2/20:1	C46H86N1O8P1	811.609	[M + CH3COO]-	[Acyl FA - H]-	870.6>279.25	7.74±0	39.0764	61.5366	171.312	123.474	61.6952	164.734	103.638	58.4419	37.9028	148.092	190.933	214.603	150.836	133.468	54.0369	167.734	131.091	98.6072	184.577	114.675	125.12
	PC 18:0/20:1	C46H90N1O8P1	815.64	[M + CH3COO]-	[Acyl FA - H]-	874.65>283.25	7.6±0.02	15.1343	13.4922	20.054	21.2861	14.5561	24.783	18.2176	16.1131	19.6589	25.9529	28.692	30.1126	14.4215	22.4918	13.0394	17.5031	25.5543	23.9825	21.0918	15.9345	19.5176
	PC 20:5/20:1	C48H84N1O8P1	833.593	[M + CH3COO]-	[Acyl FA - H]-	892.6>301.2	7.84±0.01	1.6813	4.34223	11.8751	13.4074	2.368	7.96506	6.93984	3.32444	2.39746	7.38325	13.981	19.7183	15.3494	10.359	6.06713	7.82335	11.9825	7.85108	6.14231	5.89072	7.62617
	PC 20:4/20:1	C48H86N1O8P1	835.609	[M + CH3COO]-	[Acyl FA - H]-	894.6>303.25	7.77±0.01	6.87913	6.66849	17.8751	10.4669	12.0147	12.3912	11.0492	5.54158	7.47985	18.1373	12.7658	14.3403	13.5762	11.9735	4.61784	10.8738	19.3196	5.16201	19.1268	11.3956	11.7493
	PC 14:1/20:0	C42H82N1O8P1	759.578	[M + CH3COO]-	[Acyl FA - H]-	818.6>225.2	7.71±0.01	2.59884	2.86913	5.80483	5.52682	4.99762	7.74428	4.92359	4.1772	2.3012	5.97231	6.07854	6.69144	3.47019	4.78181	1.08642	7.29329	4.89029	5.26996	8.69272	6.27714	5.58497
	PC 16:1/20:0	C44H86N1O8P1	787.609	[M + CH3COO]-	[Acyl FA - H]-	846.6>253.2	7.49±0.01	9.47827	21.4088	29.649	21.1694	6.66407	33.638	20.3346	4.60392	10.8375	20.5247	26.3819	37.1681	20.7496	20.0443	12.4062	38.5946	18.9519	16.5624	18.0816	18.254	20.4751
	PC 16:0/20:0	C44H88N1O8P1	789.625	[M + CH3COO]-	[Acyl FA - H]-	848.65>255.25	7.45±0	214.487	324.066	329.446	436.421	264.366	408.973	329.626	247.767	237.481	358.142	445.669	467.918	191.911	324.815	251.622	412.582	351.518	314.1	405.41	276.241	335.245
	PC 18:2/20:0	C46H88N1O8P1	813.625	[M + CH3COO]-	[Acyl FA - H]-	872.65>279.25	7.53±0	196.003	426.738	400.109	450.598	336.375	591.714	400.256	256.382	196.813	400.429	475.755	641.36	355.202	387.657	248.406	482.799	529.085	376.922	504.443	450.575	432.039
	PC 18:1/20:0	C46H90N1O8P1	815.64	[M + CH3COO]-	[Acyl FA - H]-	874.65>281.25	7.47±0	102.564	171.509	221.05	207.155	158.969	214.382	179.272	108.965	96.7688	166.296	211.001	225.159	147.915	159.351	115.435	208.57	175.669	142.226	214.483	194.704	175.181
	PC 20:5/20:0	C48H86N1O8P1	835.609	[M + CH3COO]-	[Acyl FA - H]-	894.6>301.2	7.61±0.01	7.18498	10.9349	18.472	23.5213	9.47043	20.3569	14.9901	8.27001	5.27473	17.0484	19.2085	31.3084	15.117	16.0378	10.3234	19.758	18.3394	18.1755	14.3713	12.8441	15.6353
	PC 20:4/20:0	C48H88N1O8P1	837.625	[M + CH3COO]-	[Acyl FA - H]-	896.65>303.25	7.55±0	58.8262	83.5609	75.4872	102.317	101.88	94.3658	86.0729	106.237	92.8556	87.4243	82.2736	142.842	69.2834	96.8193	72.5452	110.458	98.4767	83.9947	117.035	100.069	97.0964
	PC 18:2/21:0	C47H90N1O8P1	827.64	[M + CH3COO]-	[Acyl FA - H]-	886.65>279.25	7.67±0.1	15.6704	23.1864	37.7355	38.6948	17.4494	38.3922	28.5215	12.3613	9.782	29.3191	40.8479	29.2756	32.7041	25.715	24.5048	30.6329	25.7008	25.0593	34.4212	33.513	28.972
	PC 18:0/21:0	C47H94N1O8P1	831.672	[M + CH3COO]-	[Acyl FA - H]-	890.7>283.25	7.88±0	61.7451	40.5822	74.7576	93.8233	84.3468	112.861	78.0194	64.1393	83.2387	84.7944	127.785	112.971	60.1529	88.8469	68.2622	117.103	123.668	76.5331	124.995	88.5597	99.8533
	PC 16:1/22:6	C46H78N1O8P1	803.547	[M + CH3COO]-	[Acyl FA - H]-	862.55>253.2	7.9±0	15.3662	15.0458	38.2804	64.0339	19.9617	59.0194	35.2846	20.8594	17.8406	38.4579	72.0486	73.2668	28.087	41.76	17.9322	66.8771	56.8972	39.5971	34.7804	34.4703	41.759
	PC 16:0/22:6	C46H80N1O8P1	805.562	[M + CH3COO]-	[Acyl FA - H]-	864.6>255.25	7.83±0	542.893	352.172	747.012	1301.83	948.037	1116.89	834.805	600.543	663.311	875.214	1531.06	1049.93	480.596	866.776	473.165	1302.63	1300.72	1082.4	1157.14	877.659	1032.28
	PC 17:0/22:6	C47H82N1O8P1	819.578	[M + CH3COO]-	[Acyl FA - H]-	878.6>269.25	7.81±0.01	8.63762	11.0124	8.26781	13.643	13.2424	16.377	11.8634	10.487	9.39751	15.095	21.8847	18.9996	7.24929	13.8522	6.24766	20.688	13.8171	12.4761	12.4014	11.9749	12.9342
	PC 18:2/22:6	C48H80N1O8P1	829.562	[M + CH3COO]-	[Acyl FA - H]-	888.6>279.25	7.94±0	69.843	105.288	190.941	375.843	123.55	299.69	194.193	85.8563	95.812	152.832	231.975	217.96	140.079	154.086	99.8469	244.789	234.029	146.598	321.747	246.895	215.651
	PC 18:1/22:6	C48H82N1O8P1	831.578	[M + CH3COO]-	[Acyl FA - H]-	890.6>281.25	7.88±0	133.758	107.114	165.883	249.586	166.677	210.139	172.193	152.464	162.281	192.894	282.88	256.046	117.65	194.036	163.912	253.687	256.541	215.724	273.847	221.57	230.88
	PC 18:0/22:6	C48H84N1O8P1	833.593	[M + CH3COO]-	[Acyl FA - H]-	892.6>283.25	7.8±0	237.196	162.506	240.801	437.592	393.783	391.24	310.52	458.254	390.912	289.716	461.317	420.734	157.412	363.058	282.687	449.269	448.105	346.589	317.175	255.999	349.971
	PC 19:0/22:6	C49H86N1O8P1	847.609	[M + CH3COO]-	[Acyl FA - H]-	906.6>297.3	7.85±0.03	6.95632	5.04017	10.203	11.5247	7.62828	15.2664	9.43648	7.92887	4.60239	10.2075	16.533	13.3824	7.63483	10.0482	6.24802	12.7302	12.2269	8.60334	13.6754	11.4923	10.8294
	PC 20:4/22:6	C50H80N1O8P1	853.562	[M + CH3COO]-	[Acyl FA - H]-	912.6>303.25	7.97±0.01	15.8998	16.0532	39.9593	52.9469	31.4891	44.8211	33.5282	33.0942	26.5706	38.2373	41.9569	41.4762	27.3879	34.7872	24.9992	30.7692	68.6433	21.0811	57.3974	38.5463	40.2394
	PC 20:2/22:6	C50H84N1O8P1	857.593	[M + CH3COO]-	[Acyl FA - H]-	916.6>307.25	7.92±0.01	3.66891	2.24842	6.4204	8.93764	4.55979	8.29779	5.68882	1.79025	3.54787	11.5108	7.77995	6.21309	4.70439	5.92439	3.35053	7.16017	8.55935	6.77558	7.76502	7.53334	6.85733
	PC 20:1/22:6	C50H86N1O8P1	859.609	[M + CH3COO]-	[Acyl FA - H]-	918.6>309.3	7.86±0.02	3.36322	3.72198	11.0829	14.4654	3.33204	11.0629	7.83807	3.58068	3.26003	17.92	12.8861	9.91757	9.94932	9.58561	3.25945	14.8531	10.2708	5.91492	15.1817	11.5893	10.1782
	PC 20:0/22:6	C50H88N1O8P1	861.625	[M + CH3COO]-	[Acyl FA - H]-	920.65>311.3	7.63±0.03	12.078	13.0295	24.4557	26.6963	14.208	26.5561	19.5039	12.8755	14.0994	20.3065	17.9918	34.18	15.6572	19.1851	17.119	25.3288	20.5411	16.5635	19.7043	18.3511	19.6013
	PC 22:6/22:6	C52H80N1O8P1	877.562	[M + CH3COO]-	[Acyl FA - H]-	936.6>327.25	8.04±0.01	5.88594	6.04855	17.6825	29.5251	9.38276	22.4603	15.1642	10.5727	8.24768	10.3163	15.5611	18.1633	7.55772	11.7365	8.87391	17.3705	23.7268	11.9382	29.6761	21.6364	18.8703
	PC 16:0/22:5	C46H82N1O8P1	807.578	[M + CH3COO]-	[Acyl FA - H]-	866.6>255.25	7.83±0	118.782	84.7642	133.716	229.639	147.277	225.092	156.545	124.462	139.524	165.839	273.66	233.822	91.7247	171.505	76.9454	243.936	255.305	201.166	245.407	161.326	197.348
	PC 18:2/22:5	C48H82N1O8P1	831.578	[M + CH3COO]-	[Acyl FA - H]-	890.6>279.25	7.93±0	11.6953	21.9515	28.3488	71.4465	27.5411	74.4179	39.2335	19.8701	22.6388	27.804	53.7561	44.1105	33.4181	33.5996	23.459	57.191	59.226	39.0541	65.4025	66.2204	51.7588
	PC 18:1/22:5	C48H84N1O8P1	833.593	[M + CH3COO]-	[Acyl FA - H]-	892.6>281.25	7.87±0	23.0152	21.8726	33.8643	45.063	31.1203	41.0591	32.6658	28.1426	31.8537	33.1288	48.5308	44.6103	27.622	35.648	35.3294	53.5959	42.2007	25.2778	46.8411	38.3542	40.2665
	PC 18:0/22:5	C48H86N1O8P1	835.609	[M + CH3COO]-	[Acyl FA - H]-	894.6>283.25	7.79±0	49.8835	26.2955	44.3961	80.3962	70.9398	53.9082	54.3032	71.7097	74.9839	41.4965	73.116	81.7913	27.546	61.7739	39.3155	78.5588	89.0824	58.4309	51.7114	51.9833	61.5137
	PC 16:0/22:4	C46H84N1O8P1	809.593	[M + CH3COO]-	[Acyl FA - H]-	868.6>255.25	7.82±0.01	12.6908	12.4078	18.2972	27.5219	15.2576	20.4695	17.7741	13.642	14.1942	18.6791	26.9892	28.6801	11.8775	19.0103	11.0473	24.6675	21.8872	21.1891	24.3428	19.9938	20.5213
	PC 16:0/22:0	C46H92N1O8P1	817.656	[M + CH3COO]-	[Acyl FA - H]-	876.65>255.25	7.81±0.06	3.51576	2.79114	5.54083	9.17256	5.43632	9.07098	5.92127	4.60375	5.46572	5.42838	8.14434	9.43826	3.77832	6.14313	4.43659	12.198	8.43515	4.62393	14.8334	7.62835	8.69257
	PC 18:0/23:0	C49H98N1O8P1	859.703	[M + CH3COO]-	[Acyl FA - H]-	918.7>283.25	7.86±0.01	2.59868	4.3427	8.35645	7.52595	1.8411	10.4001	5.84417	2.21663	0.575299	9.55591	8.63053	12.9055	7.09568	6.82992	2.53499	10.2106	6.84719	4.19361	8.11242	7.14673	6.50759
	PC 18:2/24:1	C50H94N1O8P1	867.672	[M + CH3COO]-	[Acyl FA - H]-	926.7>279.25	7.71±0.03	1.6813	4.80758	7.21237	5.29142	1.75343	6.6377	4.56397	2.98415	1.34236	8.1226	5.22698	15.1754	7.09584	6.65789	0.995889	5.80785	5.99074	6.02266	10.3145	6.56739	5.94984
	Total PC							11447.4	11633.2	16652	23386.4	15613.4	22192	16820.7	14436.5	13780.9	17397.3	26879.5	26140.2	12325.2	18493.3	13004.6	25856.5	23274.9	18698.5	23136.1	18873.8	20474.1
	Three genotypes (Ddhd1(+/-), Ddhd1(+/-) and Ddhd1 (-/-)) were examined (n = 6). The unit of measurement is pmol/mg.
