# Supplementary material for: Oleic Acid-Containing Phosphatidylinositol Is a Blood Biomarker Candidate for SPG28
Source: Biomedicines. 2023 Apr 4;11(4):1092. doi: 10.3390/biomedicines11041092 (PMC10136216; doi:10.3390/biomedicines11041092)
Supplement: Supplementary file 1 [file biomedicines-11-01092-s001.zip › Supplementary Table S2_220901.xlsx]

## Sheet: Table S2
	Table S2. PIs detected in mouse plasma
	PIs	Formula	Exact Mass	Precursor-ion	Product-ion	MRM transition Quan	RT (min)	Ddhd1(+/+)							Ddhd1(+/−)							Ddhd1(−/−)
								#1	#2	#3	#4	#5	#6	Average	#1	#2	#3	#4	#5	#6	Average	#1	#2	#3	#4	#5	#6	Average
	PI 16:1/16:0	C41H77O13P1	808.51	[M - H]-	[Acyl FA - H]-	807.5>253.2	17.16±0.01	0.0095582	0.0115209	0.0327193	0.0240063	0.00636749	0.0344615	0.0197723	0.0127335	0.00724489	0.0305937	0.0365226	0.0513411	0.0354394	0.0289792	0.0106843	0.0653785	0.052231	0.0494004	0.0290911	0.0266142	0.0388999
	PI 16:0/16:0	C41H79O13P1	810.526	[M - H]-	[Acyl FA - H]-	809.5>255.25	17.08±0.01	0.0159393	0.0245483	0.0311923	0.0161975	0.0110083	0.0172479	0.0193556	0.0221565	0.0111325	0.0247298	0.0364193	0.0279322	0.0366356	0.026501	0.0225324	0.0325062	0.0328012	0.0353259	0.0284966	0.0260166	0.0296131
	PI 16:0/18:3	C43H77O13P1	832.51	[M - H]-	[Acyl FA - H]-	831.5>255.25	17.24±0.01	0.00949596	0.0133605	0.0159551	0.0262719	0.0098193	0.025998	0.0168168	0.0067201	0.00465084	0.0159641	0.0356201	0.0362739	0.028463	0.021282	0.00949548	0.0577326	0.0414847	0.0482031	0.0284362	0.0193521	0.0341174
	PI 16:1/18:2	C43H77O13P1	832.51	[M - H]-	[Acyl FA - H]-	831.5>253.2	17.26±0.01	0.00788981	0.00793889	0.0251143	0.0397081	0.00429582	0.0521243	0.0228452	0.0125176	0.00715565	0.0217544	0.057146	0.0461661	0.0346472	0.0298978	0.00900651	0.0834135	0.0609425	0.0697066	0.0629002	0.0485214	0.0557484
	PI 16:0/18:2	C43H79O13P1	834.526	[M - H]-	[Acyl FA - H]-	833.5>255.25	17.15±0	0.511924	0.823956	0.954085	1.02617	0.571836	1.08875	0.829453	0.740197	0.446723	1.10306	1.47898	1.48715	1.36168	1.10297	0.769601	2.21367	1.60586	2.05771	1.80532	1.22556	1.61295
	PI 17:0/18:2	C44H81O13P1	848.541	[M - H]-	[Acyl FA - H]-	847.55>269.25	17.1±0.01	0.0198866	0.0388044	0.0465771	0.0319301	0.0205605	0.0384893	0.032708	0.0308687	0.0121633	0.050391	0.0620094	0.0530838	0.0662209	0.0457895	0.0313111	0.0948244	0.043385	0.0674948	0.0574243	0.0532999	0.0579566
	PI 18:2/18:2	C45H79O13P1	858.526	[M - H]-	[Acyl FA - H]-	857.5>279.25	17.25±0	0.0234814	0.0496889	0.0644199	0.142606	0.0423653	0.157085	0.0799412	0.0427862	0.0228123	0.0618858	0.1171	0.0830718	0.13281	0.0767444	0.0498578	0.15556	0.119908	0.126337	0.33197	0.205953	0.164931
	PI 16:1/18:1	C43H79O13P1	834.526	[M - H]-	[Acyl FA - H]-	833.5>253.2	17.15±0	0.0071121	0.00600242	0.0344376	0.0244404	0.00629033	0.0306641	0.0181578	0.0112096	0.00733485	0.0252673	0.0408047	0.0398017	0.0451938	0.0282686	0.0111593	0.0757773	0.0465185	0.0353118	0.0339033	0.0328825	0.0392588
	PI 16:0/18:1	C43H81O13P1	836.541	[M - H]-	[Acyl FA - H]-	835.55>255.25	17.03±0	0.124552	0.208018	0.303235	0.268627	0.139001	0.243343	0.214463	0.214897	0.119273	0.313651	0.374338	0.419215	0.342125	0.29725	0.223906	0.622244	0.441969	0.535839	0.439043	0.358698	0.43695
	PI 17:0/18:1	C44H83O13P1	850.557	[M - H]-	[Acyl FA - H]-	849.55>269.25	16.98±0.01	0.00393749	0.00878218	0.0130086	0.0137069	0.00922918	0.0068147	0.0092465	0.00983365	0.0048593	0.0162853	0.0127277	0.0158939	0.0163783	0.012663	0.00661311	0.0268814	0.0105771	0.0193833	0.0120561	0.013895	0.014901
	PI 18:3/18:1	C45H79O13P1	858.526	[M - H]-	[Acyl FA - H]-	857.5>277.2	17.23±0.01	0.00237361	0.00261422	0.00916359	0.0133348	0.00429582	0.0171537	0.00815596	0.00402714	0.00178833	0.0107629	0.011867	0.0137861	0.0213883	0.0106033	0.00440489	0.0240206	0.0210978	0.023898	0.0216538	0.0171906	0.0187109
	PI 18:2/18:1	C45H81O13P1	860.541	[M - H]-	[Acyl FA - H]-	859.55>279.25	17.14±0	0.199948	0.223539	0.397741	0.520093	0.302294	0.609748	0.375561	0.302305	0.207432	0.487871	0.613157	0.477708	0.74013	0.471434	0.330575	0.912743	0.591341	0.707882	1.03539	0.928907	0.75114
	PI 18:1/18:1	C45H83O13P1	862.557	[M - H]-	[Acyl FA - H]-	861.55>281.25	17.02±0	0.0894169	0.136639	0.287448	0.246664	0.102326	0.248954	0.185241	0.156064	0.0909549	0.246109	0.263685	0.259083	0.400359	0.236042	0.196063	0.47999	0.375645	0.374539	0.402598	0.388278	0.369519
	PI 16:1/18:0	C43H81O13P1	836.541	[M - H]-	[Acyl FA - H]-	835.55>253.2	17.02±0.01	0.00980323	0.0157229	0.026579	0.0179999	0.00765512	0.0272612	0.0175036	0.0127514	0.010381	0.0207145	0.031602	0.0300989	0.0305186	0.0226777	0.0132252	0.0360014	0.0325598	0.0288917	0.0243163	0.0154632	0.0250763
	PI 16:0/18:0	C43H83O13P1	838.557	[M - H]-	[Acyl FA - H]-	837.55>255.25	17.01±0.02	0.0119449	0.0187939	0.0294132	0.0252642	0.0123582	0.0198566	0.0196052	0.0214461	0.0110252	0.0315208	0.0291217	0.0341475	0.0350804	0.0270569	0.0210301	0.0526329	0.0377969	0.0508668	0.0325897	0.0301072	0.0375039
	PI 18:3/18:0	C45H81O13P1	860.541	[M - H]-	[Acyl FA - H]-	859.55>277.2	17.12±0.01	0.00904295	0.0106596	0.0210829	0.0222985	0.00958843	0.0277479	0.0167367	0.0128401	0.00908901	0.0204892	0.0199196	0.0234005	0.0260955	0.018639	0.014684	0.0319663	0.0282936	0.036278	0.0271158	0.0204309	0.0264614
	PI 18:2/18:0	C45H83O13P1	862.557	[M - H]-	[Acyl FA - H]-	861.55>279.25	17.02±0	0.664907	1.16539	1.29532	1.21959	0.794506	1.38542	1.08752	0.986817	0.530162	1.27089	1.49248	1.61924	1.70328	1.26715	0.915306	2.01362	1.40329	1.86212	1.82761	1.29213	1.55235
	PI 18:1/18:0	C45H85O13P1	864.573	[M - H]-	[Acyl FA - H]-	863.55>281.25	16.93±0	0.138503	0.261372	0.305826	0.235324	0.151288	0.261451	0.225627	0.215706	0.113186	0.290763	0.326312	0.388263	0.40155	0.289297	0.198339	0.458919	0.350634	0.397953	0.346175	0.270081	0.337017
	PI 18:0/18:0	C45H87O13P1	866.588	[M - H]-	[Acyl FA - H]-	865.6>283.25	16.92±0.01	0.017715	0.0308137	0.032647	0.0318522	0.0170246	0.0332138	0.027211	0.0319938	0.0102389	0.031199	0.0347271	0.0382302	0.0463223	0.0321186	0.0257255	0.0546573	0.0491996	0.0529722	0.0413714	0.0271923	0.041853
	PI 18:2/19:0	C46H85O13P1	876.573	[M - H]-	[Acyl FA - H]-	875.55>279.25	16.97±0	0.00627363	0.0203706	0.0329702	0.0137568	0.00940499	0.0253159	0.0180154	0.00734218	0.00556238	0.0316768	0.0409034	0.0370562	0.0536987	0.0293733	0.012538	0.0606073	0.0292927	0.0321494	0.0327681	0.0265688	0.0323207
	PI 16:0/20:5	C45H77O13P1	856.51	[M - H]-	[Acyl FA - H]-	855.5>255.25	17.31±0	0.184545	0.364093	0.472724	0.605836	0.159962	0.547226	0.389064	0.393657	0.184455	0.38483	0.839394	0.66606	0.46001	0.488068	0.339903	1.29202	1.0514	1.01287	0.536079	0.353691	0.764328
	PI 17:0/20:5	C46H79O13P1	870.526	[M - H]-	[Acyl FA - H]-	869.5>269.25	17.25±0	0.0144272	0.0371873	0.0265309	0.0384191	0.00966682	0.0291137	0.0258908	0.0205719	0.00858574	0.0203958	0.0540084	0.0262179	0.0333322	0.0271853	0.0256619	0.060932	0.039087	0.0502542	0.0237345	0.019437	0.0365177
	PI 18:1/20:5	C47H79O13P1	882.526	[M - H]-	[Acyl FA - H]-	881.5>281.25	17.3±0	0.0772857	0.185212	0.215374	0.295207	0.0984587	0.33261	0.200691	0.194732	0.0993815	0.158406	0.389259	0.25349	0.261709	0.226163	0.248718	0.605031	0.418797	0.390403	0.41135	0.307315	0.396936
	PI 18:0/20:5	C47H81O13P1	884.541	[M - H]-	[Acyl FA - H]-	883.55>283.25	17.18±0	0.758327	1.26268	1.08928	1.32897	0.831107	1.3156	1.09766	1.3639	0.828248	0.888217	1.40899	0.993142	0.988174	1.07845	1.43206	1.64128	1.4111	1.66964	1.08233	0.748556	1.33083
	PI 16:1/20:4	C45H77O13P1	856.51	[M - H]-	[Acyl FA - H]-	855.5>253.2	17.31±0.01	0.0031431	0.00483933	0.0150518	0.0183151	0.00444891	0.0171598	0.010493	0.00598587	0.00286161	0.0109902	0.0269085	0.026486	0.0168678	0.0150167	0.00616759	0.0601268	0.0614587	0.0246269	0.02975	0.0208887	0.0338365
	PI 16:0/20:4	C45H79O13P1	858.526	[M - H]-	[Acyl FA - H]-	857.5>255.25	17.2±0	0.845917	1.16759	1.37567	1.56157	1.01366	1.24943	1.20231	1.77258	1.20011	1.83082	2.0287	1.54503	1.41041	1.63127	1.31155	3.24192	2.75392	3.03723	1.78411	1.3716	2.25005
	PI 17:0/20:4	C46H81O13P1	872.541	[M - H]-	[Acyl FA - H]-	871.55>269.25	17.13±0	0.0736542	0.112118	0.107955	0.107387	0.0859389	0.094618	0.0969452	0.116896	0.0739854	0.164585	0.153959	0.093645	0.12091	0.120663	0.114761	0.204425	0.102173	0.168158	0.0980241	0.0953634	0.130484
	PI 18:2/20:4	C47H79O13P1	882.526	[M - H]-	[Acyl FA - H]-	881.5>279.25	17.29±0.02	0.0102639	0.021009	0.0296576	0.0393053	0.0149594	0.0494269	0.027437	0.0210364	0.00957049	0.0242671	0.0323384	0.0245718	0.0336384	0.0242371	0.0197742	0.0579832	0.0605403	0.0309118	0.0887843	0.0678934	0.0543145
	PI 18:1/20:4	C47H81O13P1	884.541	[M - H]-	[Acyl FA - H]-	883.55>281.25	17.19±0	0.374927	0.677334	0.756649	0.743074	0.598832	0.716276	0.644515	0.732932	0.585539	0.892022	1.06943	0.663762	1.05189	0.832594	1.06534	1.90707	1.56048	1.26338	1.65756	1.51849	1.49539
	PI 18:0/20:4	C47H83O13P1	886.557	[M - H]-	[Acyl FA - H]-	885.55>283.25	17.07±0	5.06991	5.4261	4.6332	5.78553	7.06512	5.64588	5.60429	8.14316	6.94507	6.69501	6.70899	4.62324	4.80771	6.32053	6.60783	8.17072	7.1518	8.76379	6.8587	5.08635	7.10653
	PI 19:0/20:4	C48H85O13P1	900.573	[M - H]-	[Acyl FA - H]-	899.55>297.3	17±0	0.0431324	0.0776036	0.122395	0.0989131	0.0464069	0.0966656	0.0808529	0.0627233	0.050162	0.177004	0.152231	0.11115	0.142609	0.11598	0.0707721	0.218278	0.108702	0.149672	0.125979	0.112512	0.130986
	PI 19:1/20:4	C48H83O13P1	898.557	[M - H]-	[Acyl FA - H]-	897.55>295.25	17.13±0.01	0.00320749	0.00709929	0.0124415	0.00977965	0.00482995	0.00923489	0.00776547	0.00740072	0.0054562	0.0215281	0.0237393	0.0094862	0.023898	0.0152514	0.0179146	0.0430221	0.0230193	0.0169007	0.0243899	0.0184385	0.0239475
	PI 16:0/20:3	C45H81O13P1	860.541	[M - H]-	[Acyl FA - H]-	859.55>255.25	17.13±0	0.224965	0.199636	0.343255	0.469321	0.259739	0.409547	0.317744	0.435365	0.309886	0.503468	0.548126	0.454685	0.388188	0.439953	0.266537	1.01847	0.846377	0.837655	0.581082	0.378113	0.654705
	PI 17:0/20:3	C46H83O13P1	874.557	[M - H]-	[Acyl FA - H]-	873.55>269.25	17.09±0.02	0.01394	0.0151692	0.0241393	0.0243608	0.0161385	0.0290776	0.0204709	0.0229014	0.0186922	0.0258665	0.0331107	0.0245351	0.0310786	0.0260308	0.0206754	0.0465609	0.0320185	0.0363007	0.0406471	0.0293695	0.034262
	PI 18:1/20:3	C47H83O13P1	886.557	[M - H]-	[Acyl FA - H]-	885.55>281.25	17.13±0	0.100007	0.110598	0.176387	0.195619	0.127074	0.210951	0.153439	0.177449	0.152089	0.222282	0.249154	0.17678	0.287132	0.210814	0.203522	0.539577	0.438941	0.34726	0.593194	0.485597	0.434682
	PI 18:0/20:3	C47H85O13P1	888.573	[M - H]-	[Acyl FA - H]-	887.55>283.25	17.01±0.01	1.12274	0.821208	1.14582	1.35437	1.5701	1.91426	1.32142	1.77932	1.5113	1.82242	1.60122	1.29856	1.28505	1.54965	1.14526	2.21008	2.20234	2.22021	2.18811	1.46406	1.90501
	PI 19:0/20:3	C48H87O13P1	902.588	[M - H]-	[Acyl FA - H]-	901.6>297.3	16.96±0.01	0.00699266	0.00764731	0.0227951	0.016211	0.00875066	0.0298715	0.015378	0.0117212	0.00887746	0.0358078	0.0350921	0.0268128	0.0315129	0.0249707	0.00805701	0.0497131	0.0184632	0.0320912	0.0290298	0.0231995	0.026759
	PI 18:0/20:2	C47H87O13P1	890.588	[M - H]-	[Acyl FA - H]-	889.6>283.25	16.99±0.01	0.0805033	0.0539647	0.097535	0.0999058	0.105528	0.14743	0.0974778	0.135417	0.0955903	0.14206	0.124296	0.122314	0.10721	0.121148	0.071671	0.187354	0.210041	0.188361	0.167931	0.117107	0.157077
	PI 16:0/20:1	C45H85O13P1	864.573	[M - H]-	[Acyl FA - H]-	863.55>255.25	16.94±0.01	0.0108493	0.0160165	0.0253135	0.0136024	0.0067255	0.0119943	0.0140836	0.0144642	0.00783523	0.0234865	0.0246429	0.0366966	0.0344117	0.0235895	0.0155288	0.0467526	0.0415176	0.0521853	0.0381229	0.0263042	0.0367352
	PI 18:2/20:1	C47H85O13P1	888.573	[M - H]-	[Acyl FA - H]-	887.55>279.25	17.03±0.01	0.00629191	0.00968652	0.0152039	0.0198353	0.0066541	0.0210399	0.0131186	0.00785123	0.00512168	0.0206665	0.0199345	0.0171761	0.037919	0.0181115	0.0106844	0.0329945	0.0238338	0.031792	0.0382574	0.0330636	0.0284376
	PI 18:0/20:1	C47H89O13P1	892.604	[M - H]-	[Acyl FA - H]-	891.6>283.25	16.84±0.02	0.0104939	0.0154217	0.0250549	0.0154859	0.00716957	0.0199683	0.015599	0.0132029	0.00993894	0.0250055	0.0281697	0.0272802	0.0221214	0.0209531	0.0105928	0.032178	0.0392692	0.0384481	0.0289642	0.0177402	0.0278654
	PI 20:4/20:1	C49H85O13P1	912.573	[M - H]-	[Acyl FA - H]-	911.55>303.25	17.08±0.01	0.00985062	0.014242	0.0215621	0.015378	0.00680464	0.0168719	0.0141182	0.00758108	0.00748852	0.0347774	0.0198448	0.0179737	0.0404289	0.0213491	0.0237477	0.056087	0.0341222	0.0357854	0.0514365	0.044542	0.0409535
	PI 20:4/20:0	C49H87O13P1	914.588	[M - H]-	[Acyl FA - H]-	913.6>303.25	16.96±0.01	0.00508961	0.0127056	0.0471043	0.0516975	0.00488876	0.059575	0.0301768	0.00917773	0.00387028	0.0607463	0.0413188	0.0431543	0.0601207	0.036398	0.0113345	0.0883469	0.0581012	0.0886101	0.0535107	0.0411442	0.0568413
	PI 16:0/22:6	C47H79O13P1	882.526	[M - H]-	[Acyl FA - H]-	881.5>255.25	17.28±0	0.162458	0.149144	0.271092	0.536412	0.196953	0.531429	0.307915	0.332128	0.245082	0.41426	0.680886	0.679495	0.394008	0.457643	0.192638	1.1445	0.982076	0.977098	0.697218	0.503207	0.749456
	PI 18:1/22:6	C49H81O13P1	908.541	[M - H]-	[Acyl FA - H]-	907.55>281.25	17.28±0	0.0441176	0.0343744	0.0748129	0.142497	0.0525475	0.159209	0.0845931	0.0659987	0.0518123	0.100244	0.176201	0.130826	0.145171	0.111709	0.0578167	0.299914	0.240104	0.197151	0.323989	0.311539	0.238419
	PI 18:0/22:6	C49H83O13P1	910.557	[M - H]-	[Acyl FA - H]-	909.55>283.25	17.16±0	0.548704	0.340851	0.529656	0.969651	0.696562	1.18899	0.712402	0.819966	0.63496	0.785168	1.03505	0.962747	0.747265	0.83086	0.369866	1.41083	1.35455	1.39275	1.29541	0.91068	1.12235
	PI 19:0/22:6	C50H85O13P1	924.573	[M - H]-	[Acyl FA - H]-	923.55>297.3	17.12±0.02	0.0014454	0.00406595	0.00596013	0.00550792	0.00283161	0.00969488	0.00491765	0.000870545	0.000984038	0.00940363	0.0104655	0.0108458	0.0102324	0.00713365	0.00176133	0.0152106	0.00801657	0.0148609	0.00754536	0.00980819	0.00953382
	PI 20:1/22:6	C51H85O13P1	936.573	[M - H]-	[Acyl FA - H]-	935.55>309.3	16.23±3.93	0.000641344	0	0.00156426	0.00240021	0.0004602	0.00442399	0.00158167	0.000218072	8.96043e-05	0.00135907	0.00263673	0.00293412	0.00451773	0.00195922	0.000783183	0.0107536	0.00407541	0.0058283	0.00710911	0.0057215	0.00571186
	PI 20:0/22:6	C51H87O13P1	938.588	[M - H]-	[Acyl FA - H]-	937.6>311.3	14.22±6.35	0	0	0.000744737	0.00338182	7.68535e-05	0.00498061	0.00153067	0.000218072	0.000178672	0.00191637	0.00181259	0.00276478	0.00332766	0.00170302	0	0.00237145	0.00224998	0.00216679	0.00458187	0.0026322	0.00233372
	PI 15:0/22:5	C46H79O13P1	870.526	[M - H]-	[Acyl FA - H]-	869.5>241.2	17.24±0	0.0135353	0.0272079	0.028393	0.0337432	0.0147469	0.0282578	0.024314	0.0194832	0.0101968	0.0232286	0.0482355	0.032122	0.0292808	0.0270912	0.0274138	0.0757052	0.0538396	0.0585411	0.0390496	0.0282496	0.0471331
	PI 16:0/22:5	C47H81O13P1	884.541	[M - H]-	[Acyl FA - H]-	883.55>255.25	17.2±0	0.0569352	0.0397957	0.0870225	0.160566	0.0447443	0.143851	0.0888192	0.108071	0.0775083	0.127395	0.229157	0.195233	0.0969485	0.139052	0.0412188	0.340614	0.368301	0.281026	0.19136	0.139559	0.227013
	PI 18:1/22:5	C49H83O13P1	910.557	[M - H]-	[Acyl FA - H]-	909.55>281.25	17.2±0.01	0.0131509	0.0114235	0.0232452	0.0398543	0.0204082	0.0468137	0.025816	0.0256865	0.0213784	0.025493	0.0549382	0.0429406	0.0407682	0.0352008	0.0250812	0.0905245	0.0981318	0.0629601	0.101538	0.0908752	0.0781852
	PI 18:0/22:5	C49H85O13P1	912.573	[M - H]-	[Acyl FA - H]-	911.55>283.25	17.09±0.01	0.132961	0.0740943	0.134526	0.264942	0.163567	0.31642	0.181085	0.21082	0.147689	0.170315	0.280185	0.246809	0.140465	0.19938	0.0712787	0.312438	0.391447	0.341158	0.317359	0.237238	0.278486
	PI 18:0/22:4	C49H87O13P1	914.588	[M - H]-	[Acyl FA - H]-	913.6>283.25	16.97±0	0.029652	0.01263	0.0262762	0.0419323	0.0380071	0.0466933	0.0325318	0.0469661	0.040295	0.0385718	0.0469359	0.0315699	0.0284905	0.0388049	0.0169882	0.0641521	0.0606757	0.0613282	0.0492768	0.034096	0.0477528
	PI 15:0/22:2	C46H85O13P1	876.573	[M - H]-	[Acyl FA - H]-	875.55>241.2	16.98±0	0.0133529	0.0265796	0.0397429	0.0287392	0.0149365	0.0355971	0.0264914	0.0249431	0.0121244	0.0401956	0.0543672	0.0497372	0.0509365	0.0387173	0.0202694	0.0744619	0.0400895	0.0569243	0.0514958	0.037999	0.0468733
	PI 15:0/22:1	C46H87O13P1	878.588	[M - H]-	[Acyl FA - H]-	877.6>241.2	17±0.22	0.00422823	0.00697267	0.0118724	0.00597375	0.00240177	0.012991	0.00740664	0.00518933	0.000899607	0.0132953	0.0118232	0.0151831	0.0173244	0.0106192	0.00314724	0.0219496	0.0174493	0.0123446	0.0103778	0.0106114	0.0126467
	PI 20:4/22:1	C51H89O13P1	940.604	[M - H]-	[Acyl FA - H]-	939.6>303.25	17.21±0.01	0.00384845	0.00483992	0.00635467	0.00720079	0.00153369	0.00510693	0.00481408	0.011101	0.00608165	0.00495668	0.00591698	0.00358081	0.00450357	0.00602344	0.00430721	0.00907725	0.00551362	0.0104767	0.00661402	0.00279683	0.00646427
	PI 22:6/22:1	C53H89O13P1	964.604	[M - H]-	[Acyl FA - H]-	963.6>327.25	16.32±3.95	0.000192531	0.000968138	0	0.00160008	0.000230254	0.00256118	0.000925364	0.000435708	0.000894433	0.000679649	0.00255499	0.00163771	0.000401523	0.00110067	0.000391494	0.00600486	0.00311708	0.00437122	0.00120271	0.00172544	0.00280214
	PI 15:0/22:0	C46H89O13P1	880.604	[M - H]-	[Acyl FA - H]-	879.6>241.2	17.41±0.02	0.00308578	0.00782357	0.00563111	0.0230003	0.00223693	0.0276062	0.011564	0.00590427	0.00251903	0.0069797	0.0183896	0.0182652	0.010772	0.0104716	0.00250625	0.0288884	0.0330009	0.0181205	0.0332623	0.023254	0.023172
	PI 18:2/23:0	C50H93O13P1	932.635	[M - H]-	[Acyl FA - H]-	931.65>279.25	17.16±0.02	0.000192531	0.000483972	0.000819673	0.000444594	0.0021476	0.00310437	0.00119879	0.000979581	0.000357881	0.00101947	0.00214267	0.00232031	0.00341294	0.00170548	0.0014683	0.00405006	0.00287618	0.00349657	0.00262409	0.0015442	0.00267657
	PI 15:0/24:0	C48H93O13P1	908.635	[M - H]-	[Acyl FA - H]-	907.65>241.2	17.28±0	0.0241376	0.0240128	0.0447996	0.0789364	0.037006	0.105477	0.0523949	0.0617332	0.0301256	0.0695781	0.113388	0.0910188	0.0962828	0.077021	0.0424113	0.21574	0.173316	0.147989	0.234535	0.186684	0.166779
	PI 15:0/24:1	C48H91O13P1	906.62	[M - H]-	[Acyl FA - H]-	905.6>241.2	17.37±0.02	0.00115442	0.00183781	0.00641828	0.0149446	0.00178228	0.0143336	0.00674516	0.00261185	0.000536553	0.00302205	0.00506702	0.00969148	0.00833344	0.00487707	0.00156597	0.0100008	0.0182561	0.00767026	0.0300881	0.016589	0.0140284
	PI 20:5/24:1	C53H91O13P1	966.62	[M - H]-	[Acyl FA - H]-	965.6>301.2	17.19±0.03	0.00153884	0.00503409	0.00245797	0.00480077	0.00184096	0.0038029	0.00324592	0.00533274	0.00134138	0.000906199	0.000741744	0.00259296	0.00120437	0.0020199	0.00528595	0.00446867	0.00191809	0.00378735	0.00174961	0.00108964	0.00304988
	PI 18:2/25:0	C52H97O13P1	960.667	[M - H]-	[Acyl FA - H]-	959.65>279.25	17.06±0.05	0.0011114	0.00282063	0.00156426	0.00257538	0.00202396	0.00341621	0.00225197	0.00268594	0.000357702	0.00343895	0.00393909	0.00300638	0.00240109	0.00263819	0.0021423	0.00329857	0.0035712	0.00247624	0.00398701	0.004228	0.00328389
	Total PI							11.9906	14.4727	16.063	19.237	15.5815	20.0197	16.2274	20.0566	15.0427	20.1317	23.5131	18.9985	19.0704	19.4688	16.8125	33.509	27.9249	30.7613	26.5617	19.9681	25.9229
	Three genotypes (Ddhd1(+/-), Ddhd1(+/-) and Ddhd1 (-/-)) were examined (n = 6). The unit of measurement is pmol/mg.
