# Supplementary material for: Oleic Acid-Containing Phosphatidylinositol Is a Blood Biomarker Candidate for SPG28
Source: Biomedicines. 2023 Apr 4;11(4):1092. doi: 10.3390/biomedicines11041092 (PMC10136216; doi:10.3390/biomedicines11041092)
Supplement: Supplementary file 1 [file biomedicines-11-01092-s001.zip › Supplementary Table S3_230226.xlsx]

## Sheet: Table 1
	Supplementary Table S3. PIs identified from mice plasma
	PIs	Formula	Exact Mass	Precursor-ion	Product-ion	MRM transition Quan	Retention time (min)	Ddhd1(+/+)								Ddhd1(−/−)								p-value	q-value
								#1	#2	#3	#4	#5	#6	Average	±SD	#1	#2	#3	#4	#5	#6	Average	±SD
	PI 18:1/20:4	C47H81O13P1	884.541	[M - H]-	[Acyl FA - H]-	883.55>281.25	17.19±0	0.374927	0.677334	0.756649	0.743074	0.598832	0.716276	0.644515	0.131199	1.06534	1.90707	1.56048	1.26338	1.65756	1.51849	1.49539	0.270592	8.60508e-05	0.00550725	*
	PI 20:1/20:4	C49H85O13P1	912.573	[M - H]-	[Acyl FA - H]-	911.55>303.25	17.08±0.01	0.00985062	0.014242	0.0215621	0.015378	0.00680464	0.0168719	0.0141182	0.00476616	0.0237477	0.056087	0.0341222	0.0357854	0.0514365	0.044542	0.0409535	0.0109636	0.000522237	0.0167116	*
	PI 18:1/20:3	C47H83O13P1	886.557	[M - H]-	[Acyl FA - H]-	885.55>281.25	17.13±0	0.100007	0.110598	0.176387	0.195619	0.127074	0.210951	0.153439	0.0428152	0.203522	0.539577	0.438941	0.34726	0.593194	0.485597	0.434682	0.128981	0.000939843	0.02005	*
	PI 18:1/22:5	C49H83O13P1	910.557	[M - H]-	[Acyl FA - H]-	909.55>281.25	17.2±0.01	0.0131509	0.0114235	0.0232452	0.0398543	0.0204082	0.0468137	0.025816	0.0131743	0.0250812	0.0905245	0.0981318	0.0629601	0.101538	0.0908752	0.0781852	0.0267967	0.00285864	0.0457383	*
	PI 19:1/20:4	C48H83O13P1	898.557	[M - H]-	[Acyl FA - H]-	897.55>295.25	17.13±0.01	0.00320749	0.00709929	0.0124415	0.00977965	0.00482995	0.00923489	0.00776547	0.00310693	0.0179146	0.0430221	0.0230193	0.0169007	0.0243899	0.0184385	0.0239475	0.00895636	0.00339066	0.0457383	*
	PI 16:0/20:1	C45H85O13P1	864.573	[M - H]-	[Acyl FA - H]-	863.55>255.25	16.94±0.01	0.0108493	0.0160165	0.0253135	0.0136024	0.0067255	0.0119943	0.0140836	0.00575971	0.0155288	0.0467526	0.0415176	0.0521853	0.0381229	0.0263042	0.0367352	0.0123987	0.00407538	0.0457383	*
	PI 15:0/24:0	C48H93O13P1	908.635	[M - H]-	[Acyl FA - H]-	907.65>241.2	17.28±0	0.0241376	0.0240128	0.0447996	0.0789364	0.037006	0.105477	0.0523949	0.0300573	0.0424113	0.21574	0.173316	0.147989	0.234535	0.186684	0.166779	0.062246	0.00410695	0.0457383	*
	PI 18:1/18:1	C45H83O13P1	862.557	[M - H]-	[Acyl FA - H]-	861.55>281.25	17.02±0	0.0894169	0.136639	0.287448	0.246664	0.102326	0.248954	0.185241	0.0782068	0.196063	0.47999	0.375645	0.374539	0.402598	0.388278	0.369519	0.08544	0.00520313	0.0457383	*
	PI 16:0/18:1	C43H81O13P1	836.541	[M - H]-	[Acyl FA - H]-	835.55>255.25	17.03±0	0.124552	0.208018	0.303235	0.268627	0.139001	0.243343	0.214463	0.0651516	0.223906	0.622244	0.441969	0.535839	0.439043	0.358698	0.43695	0.126263	0.00571215	0.0457383	*
	PI 18:1/22:6	C49H81O13P1	908.541	[M - H]-	[Acyl FA - H]-	907.55>281.25	17.28±0	0.0441176	0.0343744	0.0748129	0.142497	0.0525475	0.159209	0.0845931	0.0486538	0.0578167	0.299914	0.240104	0.197151	0.323989	0.311539	0.238419	0.0919904	0.00794201	0.0508288
	PI 16:0/18:2	C43H79O13P1	834.526	[M - H]-	[Acyl FA - H]-	833.5>255.25	17.15±0	0.511924	0.823956	0.954085	1.02617	0.571836	1.08875	0.829453	0.21935	0.769601	2.21367	1.60586	2.05771	1.80532	1.22556	1.61295	0.492788	0.00875045	0.0509117
	PI 18:2/20:1	C47H85O13P1	888.573	[M - H]-	[Acyl FA - H]-	887.55>279.25	17.03±0.01	0.00629191	0.00968652	0.0152039	0.0198353	0.0066541	0.0210399	0.0131186	0.00594954	0.0106844	0.0329945	0.0238338	0.031792	0.0382574	0.0330636	0.0284376	0.00900201	0.00991135	0.0528605
	PI 16:0/18:0	C43H83O13P1	838.557	[M - H]-	[Acyl FA - H]-	837.55>255.25	17.01±0.02	0.0119449	0.0187939	0.0294132	0.0252642	0.0123582	0.0198566	0.0196052	0.00632642	0.0210301	0.0526329	0.0377969	0.0508668	0.0325897	0.0301072	0.0375039	0.0112382	0.0111861	0.0550702
	PI 17:0/20:3	C46H83O13P1	874.557	[M - H]-	[Acyl FA - H]-	873.55>269.25	17.09±0.02	0.01394	0.0151692	0.0241393	0.0243608	0.0161385	0.0290776	0.0204709	0.0056597	0.0206754	0.0465609	0.0320185	0.0363007	0.0406471	0.0293695	0.034262	0.00826395	0.0116648	0.0550702
	PI 18:1/20:5	C47H79O13P1	882.526	[M - H]-	[Acyl FA - H]-	881.5>281.25	17.3±0	0.0772857	0.185212	0.215374	0.295207	0.0984587	0.33261	0.200691	0.0935158	0.248718	0.605031	0.418797	0.390403	0.41135	0.307315	0.396936	0.11108	0.0128497	0.0550702
	PI 18:1/18:2	C45H81O13P1	860.541	[M - H]-	[Acyl FA - H]-	859.55>279.25	17.14±0	0.199948	0.223539	0.397741	0.520093	0.302294	0.609748	0.375561	0.150302	0.330575	0.912743	0.591341	0.707882	1.03539	0.928907	0.75114	0.239026	0.0139416	0.0557665
	PI 16:0/16:0	C41H79O13P1	810.526	[M - H]-	[Acyl FA - H]-	809.5>255.25	17.08±0.01	0.0159393	0.0245483	0.0311923	0.0161975	0.0110083	0.0172479	0.0193556	0.0066186	0.0225324	0.0325062	0.0328012	0.0353259	0.0284966	0.0260166	0.0296131	0.00438728	0.0161487	0.060795
	PI 16:0/20:4	C45H79O13P1	858.526	[M - H]-	[Acyl FA - H]-	857.5>255.25	17.2±0	0.845917	1.16759	1.37567	1.56157	1.01366	1.24943	1.20231	0.232792	1.31155	3.24192	2.75392	3.03723	1.78411	1.3716	2.25005	0.78813	0.0172239	0.0612405
	PI 20:1/22:6	C51H85O13P1	936.573	[M - H]-	[Acyl FA - H]-	935.55>309.3	16.23±3.93	0.000641344	0	0.00156426	0.00240021	0.0004602	0.00442399	0.00158167	0.00149403	0.000783183	0.0107536	0.00407541	0.0058283	0.00710911	0.0057215	0.00571186	0.00300985	0.020534	0.0691671
	PI 16:0/22:6	C47H79O13P1	882.526	[M - H]-	[Acyl FA - H]-	881.5>255.25	17.28±0	0.162458	0.149144	0.271092	0.536412	0.196953	0.531429	0.307915	0.16442	0.192638	1.1445	0.982076	0.977098	0.697218	0.503207	0.749456	0.325424	0.0220118	0.0704379
	PI 15:0/22:5	C46H79O13P1	870.526	[M - H]-	[Acyl FA - H]-	869.5>241.2	17.24±0	0.0135353	0.0272079	0.028393	0.0337432	0.0147469	0.0282578	0.024314	0.0074965	0.0274138	0.0757052	0.0538396	0.0585411	0.0390496	0.0282496	0.0471331	0.0173314	0.0222315	0.0704379
	PI 18:1/18:3	C45H79O13P1	858.526	[M - H]-	[Acyl FA - H]-	857.5>277.2	17.23±0.01	0.00237361	0.00261422	0.00916359	0.0133348	0.00429582	0.0171537	0.00815596	0.00559527	0.00440489	0.0240206	0.0210978	0.023898	0.0216538	0.0171906	0.0187109	0.0067876	0.0229714	0.0704379
	PI 16:0/20:3	C45H81O13P1	860.541	[M - H]-	[Acyl FA - H]-	859.55>255.25	17.13±0	0.224965	0.199636	0.343255	0.469321	0.259739	0.409547	0.317744	0.0982991	0.266537	1.01847	0.846377	0.837655	0.581082	0.378113	0.654705	0.269298	0.0252367	0.0704379
	PI 17:0/18:2	C44H81O13P1	848.541	[M - H]-	[Acyl FA - H]-	847.55>269.25	17.1±0.01	0.0198866	0.0388044	0.0465771	0.0319301	0.0205605	0.0384893	0.032708	0.00979367	0.0313111	0.0948244	0.043385	0.0674948	0.0574243	0.0532999	0.0579566	0.019977	0.029485	0.0786266
	PI 16:1/18:2	C43H77O13P1	832.51	[M - H]-	[Acyl FA - H]-	831.5>253.2	17.26±0.01	0.00788981	0.00793889	0.0251143	0.0397081	0.00429582	0.0521243	0.0228452	0.0179662	0.00900651	0.0834135	0.0609425	0.0697066	0.0629002	0.0485214	0.0557484	0.0233643	0.0316475	0.0810176
	PI 16:0/22:5	C47H81O13P1	884.541	[M - H]-	[Acyl FA - H]-	883.55>255.25	17.2±0	0.0569352	0.0397957	0.0870225	0.160566	0.0447443	0.143851	0.0888192	0.0475077	0.0412188	0.340614	0.368301	0.281026	0.19136	0.139559	0.227013	0.114909	0.032256	0.0810176
	PI 16:1/20:4	C45H77O13P1	856.51	[M - H]-	[Acyl FA - H]-	855.5>253.2	17.31±0.01	0.0031431	0.00483933	0.0150518	0.0183151	0.00444891	0.0171598	0.010493	0.00644114	0.00616759	0.0601268	0.0614587	0.0246269	0.02975	0.0208887	0.0338365	0.020367	0.0346374	0.0821034
	PI 18:0/18:0	C45H87O13P1	866.588	[M - H]-	[Acyl FA - H]-	865.6>283.25	16.92±0.01	0.017715	0.0308137	0.032647	0.0318522	0.0170246	0.0332138	0.027211	0.00700049	0.0257255	0.0546573	0.0491996	0.0529722	0.0413714	0.0271923	0.041853	0.0116678	0.0369228	0.0843949
	PI 18:0/20:4	C47H83O13P1	886.557	[M - H]-	[Acyl FA - H]-	885.55>283.25	17.07±0	5.06991	5.4261	4.6332	5.78553	7.06512	5.64588	5.60429	0.755969	6.60783	8.17072	7.1518	8.76379	6.8587	5.08635	7.10653	1.17419	0.0369737	0.0843949
	PI 18:0/20:2	C47H87O13P1	890.588	[M - H]-	[Acyl FA - H]-	889.6>283.25	16.99±0.01	0.0805033	0.0539647	0.097535	0.0999058	0.105528	0.14743	0.0974778	0.0281289	0.071671	0.187354	0.210041	0.188361	0.167931	0.117107	0.157077	0.0478019	0.0371377	0.0843949
	PI 18:0/18:1	C45H85O13P1	864.573	[M - H]-	[Acyl FA - H]-	863.55>281.25	16.93±0	0.138503	0.261372	0.305826	0.235324	0.151288	0.261451	0.225627	0.0608329	0.198339	0.458919	0.350634	0.397953	0.346175	0.270081	0.337017	0.0842166	0.037476	0.0843949
	PI 18:0/20:3	C47H85O13P1	888.573	[M - H]-	[Acyl FA - H]-	887.55>283.25	17.01±0.01	1.12274	0.821208	1.14582	1.35437	1.5701	1.91426	1.32142	0.349979	1.14526	2.21008	2.20234	2.22021	2.18811	1.46406	1.90501	0.434477	0.0414074	0.0843949
	PI 15:0/22:2	C46H85O13P1	876.573	[M - H]-	[Acyl FA - H]-	875.55>241.2	16.98±0	0.0133529	0.0265796	0.0397429	0.0287392	0.0149365	0.0355971	0.0264914	0.00974433	0.0202694	0.0744619	0.0400895	0.0569243	0.0514958	0.037999	0.0468733	0.0169118	0.0416921	0.0843949
	PI 18:2/23:0	C50H93O13P1	932.635	[M - H]-	[Acyl FA - H]-	931.65>279.25	17.16±0.02	0.000192531	0.000483972	0.000819673	0.000444594	0.0021476	0.00310437	0.00119879	0.00106204	0.0014683	0.00405006	0.00287618	0.00349657	0.00262409	0.0015442	0.00267657	0.000943723	0.0423509	0.0843949
	PI 18:0/20:1	C47H89O13P1	892.604	[M - H]-	[Acyl FA - H]-	891.6>283.25	16.84±0.02	0.0104939	0.0154217	0.0250549	0.0154859	0.00716957	0.0199683	0.015599	0.0058547	0.0105928	0.032178	0.0392692	0.0384481	0.0289642	0.0177402	0.0278654	0.0105096	0.0457901	0.0843949
	PI 18:2/20:4	C47H79O13P1	882.526	[M - H]-	[Acyl FA - H]-	881.5>279.25	17.29±0.02	0.0102639	0.021009	0.0296576	0.0393053	0.0149594	0.0494269	0.027437	0.0136703	0.0197742	0.0579832	0.0605403	0.0309118	0.0887843	0.0678934	0.0543145	0.0229692	0.048306	0.0858774
	PI 18:0/18:2	C45H83O13P1	862.557	[M - H]-	[Acyl FA - H]-	861.55>279.25	17.02±0	0.664907	1.16539	1.29532	1.21959	0.794506	1.38542	1.08752	0.26454	0.915306	2.01362	1.40329	1.86212	1.82761	1.29213	1.55235	0.383027	0.0496047	0.0858774
	PI 16:0/18:3	C43H77O13P1	832.51	[M - H]-	[Acyl FA - H]-	831.5>255.25	17.24±0.01	0.00949596	0.0133605	0.0159551	0.0262719	0.0098193	0.025998	0.0168168	0.00693952	0.00949548	0.0577326	0.0414847	0.0482031	0.0284362	0.0193521	0.0341174	0.0166678	0.0577744	0.0973043
	PI 18:0/18:3	C45H81O13P1	860.541	[M - H]-	[Acyl FA - H]-	859.55>277.2	17.12±0.01	0.00904295	0.0106596	0.0210829	0.0222985	0.00958843	0.0277479	0.0167367	0.00728345	0.014684	0.0319663	0.0282936	0.036278	0.0271158	0.0204309	0.0264614	0.00713594	0.0587642	0.0973043
	PI 18:2/25:0	C52H97O13P1	960.667	[M - H]-	[Acyl FA - H]-	959.65>279.25	17.06±0.05	0.0011114	0.00282063	0.00156426	0.00257538	0.00202396	0.00341621	0.00225197	0.000775591	0.0021423	0.00329857	0.0035712	0.00247624	0.00398701	0.004228	0.00328389	0.000755425	0.0589012	0.0973043
	PI 19:0/20:4	C48H85O13P1	900.573	[M - H]-	[Acyl FA - H]-	899.55>297.3	17±0	0.0431324	0.0776036	0.122395	0.0989131	0.0464069	0.0966656	0.0808529	0.0286412	0.0707721	0.218278	0.108702	0.149672	0.125979	0.112512	0.130986	0.0455664	0.0638886	0.0997286
	PI 16:1/18:1	C43H79O13P1	834.526	[M - H]-	[Acyl FA - H]-	833.5>253.2	17.15±0	0.0071121	0.00600242	0.0344376	0.0244404	0.00629033	0.0306641	0.0181578	0.012052	0.0111593	0.0757773	0.0465185	0.0353118	0.0339033	0.0328825	0.0392588	0.0194113	0.0658274	0.100308
	PI 16:0/20:5	C45H77O13P1	856.51	[M - H]-	[Acyl FA - H]-	855.5>255.25	17.31±0	0.184545	0.364093	0.472724	0.605836	0.159962	0.547226	0.389064	0.170266	0.339903	1.29202	1.0514	1.01287	0.536079	0.353691	0.764328	0.370473	0.0666063	0.100308
	PI 16:0/16:1	C41H77O13P1	808.51	[M - H]-	[Acyl FA - H]-	807.5>253.2	17.16±0.01	0.0095582	0.0115209	0.0327193	0.0240063	0.00636749	0.0344615	0.0197723	0.0112059	0.0106843	0.0653785	0.052231	0.0494004	0.0290911	0.0266142	0.0388999	0.0184046	0.0752513	0.109456
	PI 22:1/22:6	C53H89O13P1	964.604	[M - H]-	[Acyl FA - H]-	963.6>327.25	16.32±3.95	0.000192531	0.000968138	0	0.00160008	0.000230254	0.00256118	0.000925364	0.000913738	0.000391494	0.00600486	0.00311708	0.00437122	0.00120271	0.00172544	0.00280214	0.00192991	0.0777431	0.110568
	PI 19:0/22:6	C50H85O13P1	924.573	[M - H]-	[Acyl FA - H]-	923.55>297.3	17.12±0.02	0.0014454	0.00406595	0.00596013	0.00550792	0.00283161	0.00969488	0.00491765	0.00262649	0.00176133	0.0152106	0.00801657	0.0148609	0.00754536	0.00980819	0.00953382	0.004607	0.0802223	0.111614
	PI 18:0/22:6	C49H83O13P1	910.557	[M - H]-	[Acyl FA - H]-	909.55>283.25	17.16±0	0.548704	0.340851	0.529656	0.969651	0.696562	1.18899	0.712402	0.2863	0.369866	1.41083	1.35455	1.39275	1.29541	0.91068	1.12235	0.376661	0.0814179	0.111614
	PI 18:2/19:0	C46H85O13P1	876.573	[M - H]-	[Acyl FA - H]-	875.55>279.25	16.97±0	0.00627363	0.0203706	0.0329702	0.0137568	0.00940499	0.0253159	0.0180154	0.00924333	0.012538	0.0606073	0.0292927	0.0321494	0.0327681	0.0265688	0.0323207	0.0143409	0.0902883	0.120384
	PI 18:2/18:2	C45H79O13P1	858.526	[M - H]-	[Acyl FA - H]-	857.5>279.25	17.25±0	0.0234814	0.0496889	0.0644199	0.142606	0.0423653	0.157085	0.0799412	0.0510456	0.0498578	0.15556	0.119908	0.126337	0.33197	0.205953	0.164931	0.0879688	0.0912258	0.120384
	PI 15:0/22:0	C46H89O13P1	880.604	[M - H]-	[Acyl FA - H]-	879.6>241.2	17.41±0.02	0.00308578	0.00782357	0.00563111	0.0230003	0.00223693	0.0276062	0.011564	0.00996834	0.00250625	0.0288884	0.0330009	0.0181205	0.0332623	0.023254	0.023172	0.0106747	0.105911	0.135566
	PI 17:0/20:4	C46H81O13P1	872.541	[M - H]-	[Acyl FA - H]-	871.55>269.25	17.13±0	0.0736542	0.112118	0.107955	0.107387	0.0859389	0.094618	0.0969452	0.0137203	0.114761	0.204425	0.102173	0.168158	0.0980241	0.0953634	0.130484	0.0412763	0.115397	0.144812
	PI 17:0/18:1	C44H83O13P1	850.557	[M - H]-	[Acyl FA - H]-	849.55>269.25	16.98±0.01	0.00393749	0.00878218	0.0130086	0.0137069	0.00922918	0.0068147	0.0092465	0.00337549	0.00661311	0.0268814	0.0105771	0.0193833	0.0120561	0.013895	0.014901	0.00658423	0.118276	0.145571
	PI 20:0/20:4	C49H87O13P1	914.588	[M - H]-	[Acyl FA - H]-	913.6>303.25	16.96±0.01	0.00508961	0.0127056	0.0471043	0.0516975	0.00488876	0.059575	0.0301768	0.0230508	0.0113345	0.0883469	0.0581012	0.0886101	0.0535107	0.0411442	0.0568413	0.0268695	0.123051	0.14859
	PI 15:0/22:1	C46H87O13P1	878.588	[M - H]-	[Acyl FA - H]-	877.6>241.2	17±0.22	0.00422823	0.00697267	0.0118724	0.00597375	0.00240177	0.012991	0.00740664	0.00384102	0.00314724	0.0219496	0.0174493	0.0123446	0.0103778	0.0106114	0.0126467	0.00590524	0.127232	0.150793
	PI 18:0/22:4	C49H87O13P1	914.588	[M - H]-	[Acyl FA - H]-	913.6>283.25	16.97±0	0.029652	0.01263	0.0262762	0.0419323	0.0380071	0.0466933	0.0325318	0.0112724	0.0169882	0.0641521	0.0606757	0.0613282	0.0492768	0.034096	0.0477528	0.0171052	0.127608	0.150793
	PI 19:0/20:3	C48H87O13P1	902.588	[M - H]-	[Acyl FA - H]-	901.6>297.3	16.96±0.01	0.00699266	0.00764731	0.0227951	0.016211	0.00875066	0.0298715	0.015378	0.00856121	0.00805701	0.0497131	0.0184632	0.0320912	0.0290298	0.0231995	0.026759	0.0128565	0.130461	0.150793
	PI 18:0/22:5	C49H85O13P1	912.573	[M - H]-	[Acyl FA - H]-	911.55>283.25	17.09±0.01	0.132961	0.0740943	0.134526	0.264942	0.163567	0.31642	0.181085	0.0832516	0.0712787	0.312438	0.391447	0.341158	0.317359	0.237238	0.278486	0.10327	0.131641	0.150793
	PI 15:0/24:1	C48H91O13P1	906.62	[M - H]-	[Acyl FA - H]-	905.6>241.2	17.37±0.02	0.00115442	0.00183781	0.00641828	0.0149446	0.00178228	0.0143336	0.00674516	0.00584365	0.00156597	0.0100008	0.0182561	0.00767026	0.0300881	0.016589	0.0140284	0.00907656	0.162318	0.17911
	PI 16:1/18:0	C43H81O13P1	836.541	[M - H]-	[Acyl FA - H]-	835.55>253.2	17.02±0.01	0.00980323	0.0157229	0.026579	0.0179999	0.00765512	0.0272612	0.0175036	0.00749756	0.0132252	0.0360014	0.0325598	0.0288917	0.0243163	0.0154632	0.0250763	0.00839994	0.163512	0.17911
	PI 18:0/20:5	C47H81O13P1	884.541	[M - H]-	[Acyl FA - H]-	883.55>283.25	17.18±0	0.758327	1.26268	1.08928	1.32897	0.831107	1.3156	1.09766	0.228947	1.43206	1.64128	1.4111	1.66964	1.08233	0.748556	1.33083	0.323692	0.217853	0.232376
	PI 17:0/20:5	C46H79O13P1	870.526	[M - H]-	[Acyl FA - H]-	869.5>269.25	17.25±0	0.0144272	0.0371873	0.0265309	0.0384191	0.00966682	0.0291137	0.0258908	0.0107238	0.0256619	0.060932	0.039087	0.0502542	0.0237345	0.019437	0.0365177	0.0150796	0.228028	0.239243
	PI 20:4/22:1	C51H89O13P1	940.604	[M - H]-	[Acyl FA - H]-	939.6>303.25	17.21±0.01	0.00384845	0.00483992	0.00635467	0.00720079	0.00153369	0.00510693	0.00481408	0.00181887	0.00430721	0.00907725	0.00551362	0.0104767	0.00661402	0.00279683	0.00646427	0.00264437	0.277025	0.285961
	PI 20:0/22:6	C51H87O13P1	938.588	[M - H]-	[Acyl FA - H]-	937.6>311.3	14.22±6.35	0	0	0.000744737	0.00338182	7.68535e-05	0.00498061	0.00153067	0.00194705	0	0.00237145	0.00224998	0.00216679	0.00458187	0.0026322	0.00233372	0.00133078	0.463998	0.471363
	PI 20:5/24:1	C53H91O13P1	966.62	[M - H]-	[Acyl FA - H]-	965.6>301.2	17.19±0.03	0.00153884	0.00503409	0.00245797	0.00480077	0.00184096	0.0038029	0.00324592	0.00138047	0.00528595	0.00446867	0.00191809	0.00378735	0.00174961	0.00108964	0.00304988	0.00154763	0.836845	0.836845
	#1~#6 indicates individual numbers. The unit of measurement is pmol/mg. The q-value was calculated by Student's t-test followed by correction by the Benjamini-Hochberg method. *q < 0.05
