# Supplementary material for: Oleic Acid-Containing Phosphatidylinositol Is a Blood Biomarker Candidate for SPG28
Source: Biomedicines. 2023 Apr 4;11(4):1092. doi: 10.3390/biomedicines11041092 (PMC10136216; doi:10.3390/biomedicines11041092)
Supplement: Supplementary file 1 [file biomedicines-11-01092-s001.zip › Supplementary Table S4_220901.xlsx]

## Sheet: Table S3
	Supplementary Table S4. LPCs detected in mouse plasma
	LPCs	Formula	Exact Mass	Precursor-ion	Product-ion	MRM transition Quan	RT (min)	Ddhd1(+/+)							Ddhd1(+/−)							Ddhd1(−/−)
								#1	#2	#3	#4	#5	#6	Average	#1	#2	#3	#4	#5	#6	Average	#1	#2	#3	#4	#5	#6	Average
	LPC 13:0 (sn-1)	C21H44N1O7P1	453.286	[M + H]+	[C5H15O4NP]+	454.3>184.05	8.83±0.02	0.146096	0.333296	0.173768	0.0792735	0.203194	0.153177	0.181467	0.190796	0.120607	0.188175	0.249625	0.237497	0.226045	0.202124	0.11633	0.131971	0.180454	0.154608	0.232537	0.150423	0.161054
	LPC 13:0 (sn-2)	C23H48N1O7P1	481.317	[M + H]+	[C5H15O4NP]+	454.3>184.05	8.82±0.01	0.0832571	0.199277	0.291585	0.0887784	0.174262	0.143982	0.163523	0.187327	0.156071	0.123312	0.161039	0.24309	0.212751	0.180598	0.13261	0.13855	0.279439	0.18007	0.110999	0.150445	0.165352
	LPC 14:0 (sn-1)	C22H46N1O7P1	467.301	[M + H]+	[C5H15O4NP]+	468.3>184.05	9±0	5.84557	13.4963	12.6836	9.78622	9.34206	12.4842	10.6063	6.90009	6.46013	8.5572	9.79995	12.4715	10.6923	9.14685	9.14192	12.1827	6.9467	8.37516	12.0598	7.47149	9.36297
	LPC 14:0 (sn-2)	C24H50N1O7P1	495.332	[M + H]+	[C5H15O4NP]+	468.3>184.05	9.09±0	0.909106	3.65197	2.69226	2.52868	2.86729	3.13053	2.62997	1.65608	1.81504	1.64084	1.69096	2.75344	2.6394	2.03263	2.09633	2.65286	1.7004	1.64969	2.97523	1.72312	2.13294
	LPC 14:1 (sn-1)	C22H44N1O7P1	465.286	[M + H]+	[C5H15O4NP]+	466.3>184.05	8.83±0.02	0.164944	0.254249	0.261832	0.0729263	0.129643	0.0912791	0.162479	0.282443	0.223446	0.235242	0.216866	0.0944369	0.205433	0.209644	0.250176	0.200291	0.104188	0.139434	0.192237	0.201701	0.181338
	LPC 14:1 (sn-2)	C24H48N1O7P1	493.317	[M + H]+	[C5H15O4NP]+	466.3>184.05	9.12±0.06	0.0575884	0.127822	0.226242	0.0989175	0.139873	0.172168	0.137102	0.0806856	0.0638356	0.238791	0.133647	0.108946	0.161537	0.13124	0.241117	0.0853504	0.112919	0.069717	0.124006	0.116994	0.125017
	LPC 15:0 (sn-1)	C23H48N1O7P1	481.317	[M + H]+	[C5H15O4NP]+	482.3>184.05	8.96±0	8.8934	14.9526	15.7829	15.6946	10.7114	14.6073	13.4404	9.71431	10.7951	18.2002	20.044	15.109	23.0927	16.1592	13.4966	19.2621	11.6301	16.5734	19.011	16.5455	16.0865
	LPC 15:0 (sn-2)	C25H52N1O7P1	509.348	[M + H]+	[C5H15O4NP]+	482.3>184.05	9.04±0.01	1.43123	3.42085	3.84731	3.0999	2.69785	3.21215	2.95155	2.25135	2.29853	3.27882	3.99433	2.39627	5.02467	3.20733	2.57771	2.89396	2.50162	2.77702	3.58038	3.65929	2.99833
	LPC 16:1 (sn-1)	C24H48N1O7P1	493.317	[M + H]+	[C5H15O4NP]+	494.3>184.05	9.02±0	37.5421	71.4461	139.533	81.2993	47.5511	117.103	82.4125	60.8018	66.268	98.7197	90.7016	100.732	122.896	90.0199	73.837	113.415	104.033	78.2887	63.7868	69.8763	83.8728
	LPC 16:1 (sn-2)	C26H52N1O7P1	521.348	[M + H]+	[C5H15O4NP]+	494.3>184.05	9.12±0	10.7201	21.5665	38.6351	24.3349	13.2323	41.3099	24.9665	18.0428	15.4496	25.3676	25.5159	37.6416	33.8065	25.9707	21.085	40.524	39.0258	21.443	20.5795	19.9725	27.105
	LPC 17:0 (sn-1)	C25H52N1O7P1	509.348	[M + H]+	[C5H15O4NP]+	510.35>184.05	8.89±0	23.4885	35.9544	28.6574	34.9366	43.1291	44.8117	35.1629	28.4914	36.1204	38.593	54.7359	31.6932	46.6217	39.3759	39.3111	43.5084	31.4987	36.234	36.6692	40.0017	37.8705
	LPC 17:0 (sn-2)	C27H56N1O7P1	537.379	[M + H]+	[C5H15O4NP]+	510.35>184.05	8.98±0	4.38194	6.18342	6.26647	5.81422	6.4956	5.44414	5.7643	5.9225	6.48179	7.11135	9.28342	4.73067	8.79033	7.05334	6.34935	6.78129	5.40551	5.13346	6.13454	6.50187	6.051
	LPC 17:1 (sn-1)	C25H50N1O7P1	507.332	[M + H]+	[C5H15O4NP]+	508.35>184.05	8.99±0	7.5194	15.1319	18.4968	12.7199	10.2377	15.8063	13.3187	12.0744	10.3851	15.7907	17.7829	13.9003	22.3823	15.386	15.8185	21.085	15.5077	15.9845	19.4542	17.8806	17.6217
	LPC 17:1 (sn-2)	C27H54N1O7P1	535.364	[M + H]+	[C5H15O4NP]+	508.35>184.05	9.07±0.01	2.14008	4.31996	4.96847	4.77074	2.59903	6.20477	4.16717	3.27829	3.53775	5.13018	6.06936	5.10402	6.04941	4.8615	3.61623	6.44017	5.60167	4.51275	4.50653	5.21822	4.9826
	LPC 18:3 (sn-1)	C26H48N1O7P1	517.317	[M + H]+	[C5H15O4NP]+	518.3>184.05	9.14±0.01	9.77407	21.9195	19.2445	14.7625	14.016	22.7553	17.0787	15.1363	16.3329	26.3408	17.1603	12.9734	23.0451	18.4981	19.2792	21.247	18.5569	17.5225	15.0409	15.5093	17.8593
	LPC 18:3 (sn-2)	C28H52N1O7P1	545.348	[M + H]+	[C5H15O4NP]+	518.3>184.05	9.21±0	6.98168	16.4802	10.7465	13.3551	8.66361	18.5195	12.4578	11.0833	8.52066	13.2183	14.547	13.8456	19.2142	13.4049	10.7216	14.6297	15.8593	12.4917	13.4447	9.57362	12.7868
	LPC 18:4 (sn-1)	C26H46N1O7P1	515.301	[M + H]+	[C5H15O4NP]+	516.3>184.05	9.24±0.01	0.288015	0.594539	0.74161	0.523324	0.229141	0.340085	0.452786	0.366062	0.256796	0.386406	0.481562	0.349276	0.589837	0.40499	0.583719	0.478776	0.384267	0.429341	0.455254	0.382834	0.452365
	LPC 18:4 (sn-2)	C28H50N1O7P1	543.332	[M + H]+	[C5H15O4NP]+	516.3>184.05	9.32±0.01	0.219909	0.396533	0.472425	0.409125	0.158581	0.308223	0.327466	0.304341	0.248285	0.321507	0.363978	0.417454	0.472096	0.35461	0.476954	0.433449	0.503629	0.314114	0.400006	0.328744	0.409482
	LPC 19:0 (sn-1)	C27H56N1O7P1	537.379	[M + H]+	[C5H15O4NP]+	538.4>184.05	8.84±0	13.0682	16.0172	28.524	23.7422	20.5818	32.852	22.4642	17.9547	15.628	28.3176	52.2829	36.0167	38.3456	31.4242	18.7913	51.664	22.9597	26.0281	30.6446	29.9283	30.0027
	LPC 19:0 (sn-2)	C29H60N1O7P1	565.411	[M + H]+	[C5H15O4NP]+	538.4>184.05	8.91±0	2.33527	3.0308	5.41573	4.06723	3.17322	4.62132	3.77393	3.31145	3.38908	6.38682	8.12354	5.37758	7.73677	5.72087	3.95793	6.6943	4.08392	3.64479	4.23732	4.22204	4.47338
	LPC 19:1 (sn-1)	C27H54N1O7P1	535.364	[M + H]+	[C5H15O4NP]+	536.35>184.05	8.94±0.01	2.48686	4.27305	4.83522	3.78602	3.9844	3.12701	3.74876	3.41267	3.67276	5.20802	5.85527	4.86591	6.19229	4.86782	6.14937	5.66641	3.65082	3.68018	5.62589	5.50751	5.0467
	LPC 19:1 (sn-2)	C29H58N1O7P1	563.395	[M + H]+	[C5H15O4NP]+	536.35>184.05	9.02±0.01	1.16355	1.23892	1.60457	1.89708	1.77712	1.46754	1.5248	0.986766	1.44554	1.65978	2.13508	1.90955	2.09659	1.70555	1.92293	2.34799	2.20734	1.02888	1.61783	1.37058	1.74926
	LPC 20:0 (sn-1)	C28H58N1O7P1	551.395	[M + H]+	[C5H15O4NP]+	552.4>184.05	8.61±0	5.21549	9.58487	10.1764	5.99411	7.76367	7.63794	7.72875	8.15938	8.1606	8.09159	7.76883	11.0719	12.0584	9.21846	9.62506	12.3237	6.48749	6.20578	9.74079	12.305	9.44797
	LPC 20:0 (sn-2)	C30H62N1O7P1	579.426	[M + H]+	[C5H15O4NP]+	552.4>184.05	8.82±0	8.36816	15.3641	43.2473	38.4678	10.9897	63.5548	29.9987	10.4141	9.33569	32.2124	60.7104	54.8491	66.9839	39.0843	14.0948	51.5838	33.62	51.9074	55.8653	43.1058	41.6962
	LPC 20:1 (sn-1)	C28H56N1O7P1	549.379	[M + H]+	[C5H15O4NP]+	550.4>184.05	8.91±0	12.9419	25.977	43.256	25.3317	23.7858	29.8477	26.8567	17.4415	15.324	39.2214	41.8963	34.213	54.5466	33.7738	30.6757	45.4492	29.0574	28.3518	41.017	44.5831	36.5224
	LPC 20:1 (sn-2)	C30H60N1O7P1	577.411	[M + H]+	[C5H15O4NP]+	550.4>184.05	8.97±0	8.24076	13.054	20.2911	16.1114	11.6503	13.8863	13.8723	10.2635	9.01697	21.5167	20.6464	21.1754	27.7645	18.3972	15.1903	22.1883	17.4736	14.7487	21.3521	19.6441	18.4328
	LPC 20:2 (sn-1)	C28H54N1O7P1	547.364	[M + H]+	[C5H15O4NP]+	548.35>184.05	9.01±0	6.05078	7.84911	12.1138	8.89905	8.38569	10.3209	8.93657	9.71055	9.67788	15.2844	11.4605	8.45081	17.3072	11.9819	10.2809	12.6598	9.28611	7.43127	12.5034	12.9169	10.8464
	LPC 20:2 (sn-2)	C30H58N1O7P1	575.395	[M + H]+	[C5H15O4NP]+	548.35>184.05	9.09±0.01	8.2572	10.195	12.2343	11.2338	13.5202	17.4077	12.1414	16.0655	12.6729	15.5867	13.9428	13.3905	16.844	14.7504	12.4531	14.1351	16.5718	11.0046	17.1387	16.9599	14.7105
	LPC 20:3 (sn-1)	C28H52N1O7P1	545.348	[M + H]+	[C5H15O4NP]+	546.35>184.05	9.08±0.01	55.5402	64.4103	58.1283	56.0304	85.7826	53.3	62.1987	87.1497	94.0123	115.101	57.4791	41.0876	95.0014	81.6385	83.4519	76.2496	77.553	51.0059	75.5664	74.317	73.024
	LPC 20:3 (sn-2)	C30H56N1O7P1	573.379	[M + H]+	[C5H15O4NP]+	546.35>184.05	9.16±0	55.4852	58.5332	55.1108	68.9827	88.6743	103.667	71.7422	113.609	102.531	95.8185	83.5014	56.0953	86.3394	89.649	89.2334	94.3305	102.875	53.3753	107.199	81.4561	88.0783
	LPC 20:4 (sn-1)	C28H50N1O7P1	543.332	[M + H]+	[C5H15O4NP]+	544.35>184.05	9.11±0	146.859	186.119	155.998	120.743	253.171	127.848	165.123	273.92	277.785	320.21	125.563	91.2441	260.579	224.884	258.265	146.906	176.761	116.347	163.432	152.293	169
	LPC 20:4 (sn-2)	C30H54N1O7P1	571.364	[M + H]+	[C5H15O4NP]+	544.35>184.05	9.19±0.02	147.575	161.107	159.376	169.798	265.61	222.711	187.696	313.174	291.546	221.924	201.138	144.256	253.192	237.538	263.722	184.895	212.435	124.752	231.149	179.012	199.328
	LPC 20:5 (sn-1)	C28H48N1O7P1	541.317	[M + H]+	[C5H15O4NP]+	542.3>184.05	9.22±0	115.014	193.305	186.914	117.003	125.137	160.79	149.694	227.502	177.879	182.427	163.837	126.824	225.615	184.014	271.297	178.048	185.443	138.009	113.128	134.403	170.055
	LPC 20:5 (sn-2)	C30H52N1O7P1	569.348	[M + H]+	[C5H15O4NP]+	542.3>184.05	9.31±0	61.5787	129.136	92.6408	116.074	78.9282	139.045	102.9	177.257	95.9923	96.795	127.792	123.093	165.291	131.037	140.607	143.624	222.596	90.4494	109.459	103.829	135.094
	LPC 21:0 (sn-1)	C29H60N1O7P1	565.411	[M + H]+	[C5H15O4NP]+	566.4>184.05	9.37±0.01	0.785139	1.07917	1.59714	1.83433	1.42984	1.59104	1.38611	1.55354	1.31645	2.17974	1.61677	1.64559	1.65965	1.66196	1.34215	2.18393	2.62994	1.42625	1.7003	1.59642	1.81317
	LPC 21:0 (sn-2)	C31H64N1O7P1	593.442	[M + H]+	[C5H15O4NP]+	566.4>184.05	8.9±0.04	0.257101	0.237065	0.491095	0.670445	0.308721	0.558855	0.420547	0.249001	0.420712	0.521826	0.594283	0.524199	0.765938	0.51266	0.308645	0.578551	0.504193	0.469941	0.540795	0.596757	0.499814
	LPC 22:0 (sn-1)	C30H62N1O7P1	579.426	[M + H]+	[C5H15O4NP]+	580.45>184.05	8.78±0	2.85892	3.81195	7.74243	8.01204	4.85171	9.66462	6.15694	4.41411	4.828	7.62396	9.51147	9.46022	7.60227	7.24001	3.27143	8.33628	6.44826	7.46138	7.38737	7.47232	6.72951
	LPC 22:0 (sn-2)	C32H66N1O7P1	607.458	[M + H]+	[C5H15O4NP]+	580.45>184.05	8.89±0.01	9.45978	8.09806	10.9696	22.2356	14.9443	17.6117	13.8865	9.661	14.1865	15.8208	17.7067	13.8952	11.1008	13.7285	6.8501	17.523	18.26	15.0568	14.8618	12.0582	14.1017
	LPC 22:1 (sn-1)	C30H60N1O7P1	577.411	[M + H]+	[C5H15O4NP]+	578.4>184.05	8.87±0	3.2141	6.1677	9.7369	7.5416	6.40991	6.24918	6.55323	5.85662	4.61003	10.1307	8.29833	7.56702	10.4491	7.81863	7.06695	8.86729	5.98229	7.16523	8.69705	9.50936	7.88136
	LPC 22:1 (sn-2)	C32H64N1O7P1	605.442	[M + H]+	[C5H15O4NP]+	578.4>184.05	8.93±0	2.29209	3.21436	4.68833	3.34586	3.81739	3.59959	3.49294	2.90688	2.87916	4.60452	4.04394	3.66209	6.82281	4.15323	3.62425	3.7167	3.40517	2.39737	3.87441	3.83674	3.47577
	LPC 22:2 (sn-1)	C30H58N1O7P1	575.395	[M + H]+	[C5H15O4NP]+	576.4>184.05	8.99±0.05	0.395349	0.549824	0.910013	0.951504	0.472155	0.745787	0.670772	0.538941	0.391589	1.19425	0.829466	0.910405	1.42044	0.880848	0.706613	1.13429	0.979941	0.93756	1.25978	1.254	1.04536
	LPC 22:2 (sn-2)	C32H62N1O7P1	603.426	[M + H]+	[C5H15O4NP]+	576.4>184.05	9.13±0.06	0.314171	0.444628	0.55986	0.468685	0.45768	0.64035	0.480896	0.742508	0.703759	0.581686	0.562054	0.511863	0.661503	0.627229	0.555825	0.559524	0.585105	0.579081	0.697091	0.552771	0.588233
	LPC 22:3 (sn-1)	C30H56N1O7P1	573.379	[M + H]+	[C5H15O4NP]+	574.4>184.05	9.07±0.03	0.222527	0.340173	0.35575	0.251143	0.301511	0.349881	0.303497	0.285295	0.261052	0.445546	0.353207	0.307368	0.538584	0.365175	0.28033	0.416989	0.377241	0.348652	0.545166	0.351032	0.386568
	LPC 22:3 (sn-2)	C32H60N1O7P1	601.411	[M + H]+	[C5H15O4NP]+	574.4>184.05	9.16±0.02	0.162315	0.299602	0.150457	0.260026	0.132651	0.24997	0.20917	0.226532	0.213523	0.147558	0.221149	0.11679	0.364331	0.21498	0.214597	0.20423	0.268385	0.186138	0.290855	0.296969	0.243529
	LPC 22:4 (sn-1)	C30H54N1O7P1	571.364	[M + H]+	[C5H15O4NP]+	572.35>184.05	9.18±0	1.02193	1.3666	1.84219	1.99914	2.05177	1.56349	1.64085	2.473	2.39542	2.61856	2.09808	1.39329	2.08629	2.17744	2.0613	2.59537	2.34002	2.17963	1.97655	2.36717	2.25334
	LPC 22:4 (sn-2)	C32H58N1O7P1	599.395	[M + H]+	[C5H15O4NP]+	572.35>184.05	9.23±0.02	0.893117	0.928672	1.35712	2.48735	1.4281	2.23242	1.55446	2.06476	1.58641	1.5998	2.15242	1.55458	1.836	1.799	1.34615	2.54357	3.03616	2.04417	1.96489	1.79606	2.12183
	LPC 22:5 (sn-1)	C30H52N1O7P1	569.348	[M + H]+	[C5H15O4NP]+	570.35>184.05	9.25±0	14.4302	17.1094	24.6313	38.7367	26.575	30.4708	25.3256	29.4516	33.4157	45.1995	36.3682	30.532	30.4066	34.2289	27.1206	46.5024	52.4251	41.8527	34.6262	35.3733	39.65
	LPC 22:5 (sn-2)	C32H56N1O7P1	597.379	[M + H]+	[C5H15O4NP]+	570.35>184.05	9.28±0	13.5007	17.1379	21.3243	39.6909	24.5841	39.1259	25.894	31.5928	28.6798	26.5366	35.556	25.9265	31.4847	29.9627	23.6465	42.6607	52.8177	30.7704	35.1231	32.6448	36.2772
	LPC 22:6 (sn-1)	C30H50N1O7P1	567.332	[M + H]+	[C5H15O4NP]+	568.35>184.05	9.23±0	135.736	168.076	208.188	305.959	276.799	207.317	217.013	224.781	314.768	423.798	240.83	214.516	282.138	283.472	246.877	314.604	351.875	277.435	284.667	270.908	291.061
	LPC 22:6 (sn-2)	C32H54N1O7P1	595.364	[M + H]+	[C5H15O4NP]+	568.35>184.05	9.32±0	203.944	201.85	251.477	442.032	366.291	442.05	317.941	355.664	309.129	287.228	384.71	314.765	346.343	332.973	249.815	445.552	528.389	351.361	453.392	400.512	404.837
	LPC 23:0 (sn-1)	C31H64N1O7P1	593.442	[M + H]+	[C5H15O4NP]+	594.45>184.05	8.8±0.01	4.45417	4.77897	6.59217	8.091	5.50512	8.45891	6.31339	5.21766	5.97129	6.52737	10.6279	6.63861	6.18986	6.86212	4.20648	9.25986	8.41509	7.14994	7.39907	6.55053	7.1635
	LPC 23:0 (sn-2)	C33H68N1O7P1	621.473	[M + H]+	[C5H15O4NP]+	594.45>184.05	8.84±0	3.09744	3.18423	4.15166	6.63181	4.67093	4.34216	4.34637	4.12064	5.09684	4.59062	6.04999	4.8368	4.33721	4.83869	3.26042	5.01284	5.40992	4.53501	4.27322	3.82788	4.38655
	LPC 24:0 (sn-1)	C32H66N1O7P1	607.458	[M + H]+	[C5H15O4NP]+	608.45>184.05	8.74±0.01	6.22645	7.25071	13.6113	14.5859	10.5715	14.4551	11.1168	9.58839	11.0298	10.5169	14.3329	12.4987	9.6972	11.2773	5.86249	16.5006	11.4484	13.3775	12.3084	10.5624	11.6766
	LPC 24:0 (sn-2)	C34H70N1O7P1	635.489	[M + H]+	[C5H15O4NP]+	608.45>184.05	8.8±0.01	6.21778	4.89279	6.72469	12.2435	9.36426	8.56097	8.00066	8.24818	10.5966	8.41029	10.8555	8.74439	6.45413	8.88485	6.05806	8.95985	10.4971	7.37762	9.62712	6.96902	8.24813
	LPC 24:1 (sn-1)	C32H64N1O7P1	605.442	[M + H]+	[C5H15O4NP]+	606.45>184.05	8.84±0	4.89724	6.30825	7.95164	9.61371	7.04285	10.8811	7.78247	7.97242	5.97291	10.6678	13.1645	12.8382	12.7029	10.5531	6.42803	13.7679	8.45918	8.7959	9.03388	11.5978	9.68044
	LPC 24:1 (sn-2)	C34H68N1O7P1	633.473	[M + H]+	[C5H15O4NP]+	606.45>184.05	8.93±0	1.15377	1.7568	2.33293	2.41936	2.03361	2.15533	1.9753	1.83105	1.96828	2.3872	2.59958	2.72137	2.63598	2.35724	1.70454	2.25603	2.4634	1.6195	2.38574	2.48694	2.15269
	LPC 25:0 (sn-1)	C33H68N1O7P1	621.473	[M + H]+	[C5H15O4NP]+	622.5>184.05	8.76±0.01	6.61671	5.5991	7.12187	10.1385	9.96216	7.81685	7.87586	8.84523	9.86558	8.48332	10.6346	8.71928	6.22828	8.79605	6.80762	9.38973	9.5866	7.85038	8.44108	6.44438	8.08663
	LPC 25:0 (sn-2)	C35H72N1O7P1	649.505	[M + H]+	[C5H15O4NP]+	622.5>184.05	8.78±0	2.8844	2.3731	2.45744	4.69835	4.12641	3.65554	3.36587	4.519	4.99899	3.72894	4.55613	3.78393	3.05193	4.10649	3.40534	3.99717	4.20518	3.46051	3.53883	2.98935	3.5994
	LPC 26:0 (sn-1)	C34H70N1O7P1	635.489	[M + H]+	[C5H15O4NP]+	636.5>184.05	8.71±0.01	8.99323	9.63937	10.4527	14.7606	12.5575	11.3379	11.2902	8.96105	12.8744	14.3984	12.9698	12.1429	10.6742	12.0035	10.2215	14.7528	12.9452	12.402	13.0217	11.1547	12.4163
	LPC 26:0 (sn-2)	C36H74N1O7P1	663.52	[M + H]+	[C5H15O4NP]+	636.5>184.05	8.76±0	3.82427	4.28502	3.95028	7.04114	5.31308	4.73932	4.85885	4.11438	5.43587	5.78653	6.48855	5.9983	4.77663	5.43338	5.17863	6.434	4.85208	5.57893	5.74778	4.86062	5.44201
	LPC 27:0 (sn-1)	C35H72N1O7P1	649.505	[M + H]+	[C5H15O4NP]+	650.5>184.05	8.65±0	7.02254	8.70703	11.6339	19.9384	11.4234	12.8467	11.9287	8.39751	9.83288	14.0852	16.7957	18.0141	9.79743	12.8205	7.42628	20.1061	15.6899	17.8276	20.3014	13.5482	15.8166
	LPC 27:0 (sn-2)	C37H76N1O7P1	677.536	[M + H]+	[C5H15O4NP]+	650.5>184.05	8.75±0	7.11012	9.05388	9.46177	21.1364	12.0404	13.5784	12.0635	9.16362	9.73416	12.7704	16.2599	18.6092	10.1124	12.775	7.43368	15.0486	12.9674	15.1477	15.3923	11.8009	12.9651
	LPC 28:0 (sn-1)	C36H74N1O7P1	663.52	[M + H]+	[C5H15O4NP]+	664.55>184.05	8.65±0.02	1.82554	2.04266	1.99086	3.22209	2.7518	2.43952	2.37874	2.59025	2.66431	3.38477	3.10511	3.45973	1.78172	2.83098	2.07212	3.30629	3.13318	2.86669	2.45106	2.1525	2.66364
	LPC 28:0 (sn-2)	C38H78N1O7P1	691.552	[M + H]+	[C5H15O4NP]+	664.55>184.05	8.75±0.01	2.07353	2.05479	2.61651	4.01204	3.20886	2.91482	2.81342	2.48111	2.89089	3.01033	3.45535	3.8509	2.52288	3.03525	2.25253	3.69452	3.3312	3.4515	3.49016	2.99379	3.20228
	LPC 16:0 (sn-1)	C24H50N1O7P1	495.332	[M + H]+	[C5H15O4NP]+	494.3>184.05	8.93±0	1145.07	1066.61	1697.53	1682.16	1621.83	1863.04	1512.71	1347.68	1929.32	2043.28	1798.02	1856.47	1503.72	1746.42	1521.83	1550.04	1477.06	1522.17	1707.78	1441.63	1536.75
	LPC 16:0 (sn-2)	C24H50N1O7P1	495.332	[M + H]+	[C5H15O4NP]+	494.3>184.05	8.93±0	1164.7	993.143	1740.34	1363.53	1652.49	1567.51	1413.62	1334.41	1641.79	1537.6	1884.29	1741.12	1304.05	1573.88	1158.42	1462.3	1591.33	1714.57	1827.78	1646.06	1566.74
	LPC 18:0 (sn-1)	C26H54N1O7P1	523.364	[M + H]+	[C5H15O4NP]+	522.35>184.05	8.87±0	463.082	329.43	444.499	438.464	711.26	582.414	494.858	691.342	861.401	474.373	686.279	562.225	370.246	607.644	632.095	602.226	593.934	435.564	596.64	477.578	556.34
	LPC 18:0 (sn-2)	C26H54N1O7P1	523.364	[M + H]+	[C5H15O4NP]+	522.35>184.05	8.87±0	500.448	338.38	447.206	470.205	617.34	606.659	496.706	524.766	848.044	546.009	717.604	585.565	399.325	603.552	614.429	557.517	603.337	500.268	452.848	421.255	524.942
	LPC 18:1 (sn-1)	C26H52N1O7P1	521.348	[M + H]+	[C5H15O4NP]+	520.35>184.05	8.96±0	284.399	266.81	426.654	233.918	417.184	291.4	320.061	361.141	492.463	415.916	357.787	385.627	268.784	380.286	517.93	306.504	414.584	346.111	361.927	440.284	397.89
	LPC 18:1 (sn-2)	C26H52N1O7P1	521.348	[M + H]+	[C5H15O4NP]+	520.35>184.05	8.96±0	265.699	293.305	439.724	351.083	331.328	399.488	346.771	345.943	423.441	518.542	435.537	284.384	323.336	388.531	506.525	467.584	444.477	319.498	312.765	416.49	411.223
	LPC 18:2 (sn-1)	C26H50N1O7P1	519.332	[M + H]+	[C5H15O4NP]+	518.3>184.05	9.07±0	875.812	880.701	1302.32	728.442	848.652	771.996	901.32	920.674	1021.72	1061.4	879.003	790.803	1109.34	963.823	1141.63	757.589	775.628	677.126	899.423	1162.37	902.295
	LPC 18:2 (sn-2)	C26H50N1O7P1	519.332	[M + H]+	[C5H15O4NP]+	518.3>184.05	9.06±0	739.878	919.363	1117.62	848.873	1010.13	779.69	902.592	711.422	898.933	1031.71	866.21	935.608	860.126	884.001	1183.5	964.919	978.606	541.853	1108.02	1163.76	990.111
	LPC total							6665.74	6720	9446.55	8144.21	9217.13	9033.08	8204.45	8462.99	10249.4	10037	9759.15	8920.67	8627.59	9342.81	9372.62	9054	9405.58	7860.52	9454.64	9179.61	9054.5
	Total LPC (sn-1)							3417.9	3467.99	4920.88	4060.02	4641.77	4488.91	4166.25	4420.97	5474.2	5477.09	4779.94	4477.11	4604.86	4872.36	5005.61	4448.56	4453.99	3940.81	4598.15	4546.98	4499.02
	Total LPC (sn-2)							3247.84	3252.01	4525.67	4084.19	4575.36	4544.17	4038.21	4042.02	4775.23	4559.91	4979.2	4443.57	4022.73	4470.44	4367.01	4605.44	4951.59	3919.71	4856.49	4632.63	4555.48
	Three genotypes (Ddhd1(+/-), Ddhd1(+/-) and Ddhd1 (-/-)) were examined (n = 6). The unit of measurement is pmol/mg.
