# Supplementary material for: Oleic Acid-Containing Phosphatidylinositol Is a Blood Biomarker Candidate for SPG28
Source: Biomedicines. 2023 Apr 4;11(4):1092. doi: 10.3390/biomedicines11041092 (PMC10136216; doi:10.3390/biomedicines11041092)
Supplement: Supplementary file 1 [file biomedicines-11-01092-s001.zip › Supplementary Table S5_220901.xlsx]

## Sheet: Table S4
	Supplementary Table S5. LPIs detected in mouse plasma
	LPIs	Formula	Exact Mass	Precursor-ion	Product-ion	MRM transition Quan	RT (min)	Ddhd1(+/+)							Ddhd1(+/−)							Ddhd1(−/−)
								#1	#2	#3	#4	#5	#6	Average	#1	#2	#3	#4	#5	#6	Average	#1	#2	#3	#4	#5	#6	Average
	LPI 20:3 (sn-1)	C29H51O12P1	622.312	[M + H]+	[M + H - C6H13O9P]	623.3>363.3	19.6±0.04	0.374955	0.041044	0.686775	0.20648	0.242671	0.411492	0.327236	0.296609	0.664387	0.392499	0.215021	0.270417	0.263807	0.350457	0.272092	0.417665	0.501332	0.256239	0.136137	0.24455	0.304669
	LPI 20:3 (sn-2)	C31H55O12P1	650.343	[M + H]+	[M + H - C6H13O9P]	623.3>363.3	19.75±0.01	0.63475	0.276446	0.57108	0.488348	0.634087	0.887494	0.582034	0.529682	0.656745	0.629728	0.573807	0.559636	0.424029	0.562271	0.844806	0.69045	1.22848	0.208951	0.783486	0.742207	0.749729
	LPI 20:4 (sn-1)	C29H49O12P1	620.296	[M + H]+	[M + H - C6H13O9P]	621.3>361.25	19.72±0.01	2.12129	2.229	2.89694	1.33303	2.939	1.05	2.09488	2.11564	3.6881	2.93297	1.08803	1.1762	1.42802	2.07149	4.78505	1.11625	1.60963	1.4844	1.25951	1.99047	2.04089
	LPI 20:4 (sn-2)	C31H53O12P1	648.327	[M + H]+	[M + H - C6H13O9P]	621.3>361.25	19.87±0.01	1.94713	1.51373	1.57163	1.70914	2.66565	1.88604	1.88222	2.50073	3.20098	1.96158	1.37935	1.82236	1.24438	2.01823	3.08017	1.95605	3.27774	1.76068	2.28905	2.03009	2.39896
	LPI 22:6 (sn-1)	C31H49O12P1	644.296	[M + H]+	[M + H - C6H13O9P]	645.3>385.25	19.82±0.02	0.262757	0.228642	0.304768	0.0716346	0.275142	0.283195	0.23769	0.313924	0.301657	0.184454	0.143433	0.353576	0.220964	0.253002	0.157535	0.148641	0.401454	0.302023	0.307371	0.439608	0.292772
	LPI 22:6 (sn-2)	C33H53O12P1	672.327	[M + H]+	[M + H - C6H13O9P]	645.3>385.25	19.96±0.03	0.450174	0.164815	0.532365	0.337966	0.316917	0.417618	0.369976	0.259123	0.299288	0.360281	0.303961	0.430635	0.264511	0.319633	0.302688	0.685516	0.843577	0.696612	0.436146	0.407841	0.562063
	LPI total							5.79106	4.45367	6.56356	4.1466	7.07347	4.93584	5.49403	6.01571	8.81116	6.46152	3.70361	4.61282	3.84571	5.57509	9.44233	5.01457	7.8622	4.70891	5.21171	5.85477	6.34908
	Total LPI (sn-1)							2.759	2.49868	3.88848	1.61114	3.45682	1.74468	2.6598	2.72618	4.65414	3.50993	1.44649	1.80019	1.91279	2.67495	5.21467	1.68256	2.51241	2.04266	1.70302	2.67463	2.63833
	Total LPI (sn-2)							3.03206	1.95499	2.67507	2.53546	3.61666	3.19116	2.83423	3.28954	4.15701	2.95159	2.25712	2.81263	1.93292	2.90013	4.22766	3.33201	5.34979	2.66625	3.50869	3.18014	3.71076
	Three genotypes (Ddhd1(+/-), Ddhd1(+/-) and Ddhd1 (-/-)) were examined (n = 6). The unit of measurement is pmol/mg.
