# Supplementary material for: Oleic Acid-Containing Phosphatidylinositol Is a Blood Biomarker Candidate for SPG28
Source: Biomedicines. 2023 Apr 4;11(4):1092. doi: 10.3390/biomedicines11041092 (PMC10136216; doi:10.3390/biomedicines11041092)
Supplement: Supplementary file 1 [file biomedicines-11-01092-s001.zip › Supplementary Table S6_220901.xlsx]

## Sheet: Table S5
	Supplementary Table S6. LPAs detected in mouse plasma
	LPAs	Formula	Exact Mass	Precursor-ion	Product-ion	MRM transition Quan	RT (min)	Ddhd1(+/+)							Ddhd1(+/−)							Ddhd1(−/−)
								#1	#2	#3	#4	#5	#6	Average	#1	#2	#3	#4	#5	#6	Average	#1	#2	#3	#4	#5	#6	Average
	LPA 18:2	C21H39O7P1	434.243	[M - H]-	[C3H6O5P]-	433.25>153	22.89±0.03	0.222007	0.739492	0.92631	0.49787	0.311971	0.57606	0.545619	0.412566	0.376065	1.2886	0.424349	0.579809	0.630503	0.618649	0.677464	0.664261	0.507219	0.492905	0.40001	0.445265	0.531187
	LPA 18:0	C21H43O7P1	438.275	[M - H]-	[C3H6O5P]-	437.25>153	22.89±0.03	0.312012	0.394622	0.264849	0.344037	0.309125	0.346956	0.3286	0.42976	0.418001	0.539348	0.327624	0.29824	0.404103	0.402846	0.406358	0.516679	0.437571	0.534697	0.41305	0.316526	0.43748
	LPA 20:4	C23H39O7P1	458.243	[M - H]-	[C3H6O5P]-	457.25>153	22.89±0.04	0.0444405	0.102066	0.118731	0.0646527	0.0833064	0.0818273	0.082504	0.116949	0.125726	0.373844	0.0643646	0.0724018	0.0819561	0.139207	0.122542	0.095771	0.113113	0.0472491	0.0454104	0.0477897	0.078646
	LPA 20:3	C23H41O7P1	460.259	[M - H]-	[C3H6O5P]-	459.25>153	22.89±0.03	0.741611	0.698111	0.496605	0.907874	0.736789	1.087	0.777999	0.91002	0.837159	0.948046	0.728549	0.975622	0.804544	0.867323	0.565976	0.877949	0.877143	0.834859	0.754014	0.864	0.795657
	LPA 20:2	C23H43O7P1	462.275	[M - H]-	[C3H6O5P]-	461.25>153	22.89±0.02	0.265195	0.244083	0.173111	0.328588	0.25541	0.381028	0.274569	0.311329	0.287914	0.274669	0.223159	0.333712	0.282244	0.285504	0.202653	0.335261	0.286219	0.256939	0.243141	0.278267	0.26708
	LPA 22:6	C25H39O7P1	482.243	[M - H]-	[C3H6O5P]-	481.25>153	22.89±0.13	1.33705	1.76052	1.49839	1.67484	1.28705	1.3166	1.47908	1.2882	1.35724	1.73995	1.17716	1.20353	1.22387	1.33166	1.23776	1.38692	1.52675	1.46708	1.30116	1.33764	1.37622
	LPA 22:5	C25H41O7P1	484.259	[M - H]-	[C3H6O5P]-	483.25>153	22.84±0.06	0.852754	1.0193	0.879024	1.06693	0.847896	0.766441	0.905391	0.767585	0.977254	0.965565	0.790996	0.751294	0.797449	0.841691	0.892931	0.885739	0.909642	0.872808	0.805178	0.908744	0.879174
	LPA 24:0	C27H55O7P1	522.369	[M - H]-	[C3H6O5P]-	521.35>153	22.32±0.06	0.69768	0.930189	0.750803	1.06977	1.54125	2.0244	1.16902	2.17898	3.38983	3.07758	1.64504	1.77594	2.4356	2.41716	3.30638	3.40885	3.27238	3.67287	2.73859	2.32163	3.12012
	Total LPA							4.47275	5.88838	5.10782	5.95457	5.3728	6.58031	5.56277	6.41538	7.76919	9.2076	5.38123	5.99054	6.66027	6.90404	7.41206	8.17144	7.93004	8.17941	6.70055	6.51986	7.48556
	Three genotypes (Ddhd1(+/-), Ddhd1(+/-) and Ddhd1 (-/-)) were examined (n = 6). The unit of measurement is pmol/mg.
