# Supplementary material for: Oleic Acid-Containing Phosphatidylinositol Is a Blood Biomarker Candidate for SPG28
Source: Biomedicines. 2023 Apr 4;11(4):1092. doi: 10.3390/biomedicines11041092 (PMC10136216; doi:10.3390/biomedicines11041092)
Supplement: Supplementary file 1 [file biomedicines-11-01092-s001.zip › Supplementary Table S7_230226.xlsx]

## Sheet: Table 2
	Supplementary Table S7. LPAs identified from mice plasma
	LPAs	Formula	Exact Mass	Precursor-ion	Product-ion	MRM transition Quan	Retention time (min)	Ddhd1(+/+)								Ddhd1(−/−)								p-value	q-value
								#1	#2	#3	#4	#5	#6	Average	±SD	#1	#2	#3	#4	#5	#6	Average	±SD
	LPA 24:0	C23H39O7P1	458.243	[M - H]-	[C3H6O5P]-	457.25>153	22.89±0.04	0.69768	0.930189	0.750803	1.06977	1.54125	2.0244	1.16902	0.471555	3.30638	3.40885	3.27238	3.67287	2.73859	2.32163	3.12012	0.452756	5.54248e-05	0.000443399	*
	LPA 18:0	C21H43O7P1	438.275	[M - H]-	[C3H6O5P]-	437.25>153	22.89±0.03	0.312012	0.394622	0.264849	0.344037	0.309125	0.346956	0.3286	0.0401099	0.406358	0.516679	0.437571	0.534697	0.41305	0.316526	0.43748	0.0729373	0.0151731	0.0606925
	LPA 22:6	C25H39O7P1	482.243	[M - H]-	[C3H6O5P]-	481.25>153	22.89±0.13	1.33705	1.76052	1.49839	1.67484	1.28705	1.3166	1.47908	0.183189	1.23776	1.38692	1.52675	1.46708	1.30116	1.33764	1.37622	0.0977459	0.293935	0.783827
	LPA 22:5	C25H41O7P1	484.259	[M - H]-	[C3H6O5P]-	483.25>153	22.84±0.06	0.852754	1.0193	0.879024	1.06693	0.847896	0.766441	0.905391	0.104202	0.892931	0.885739	0.909642	0.872808	0.805178	0.908744	0.879174	0.0354755	0.60596	> 0.99
	LPA 20:2	C23H43O7P1	462.275	[M - H]-	[C3H6O5P]-	461.25>153	22.89±0.02	0.265195	0.244083	0.173111	0.328588	0.25541	0.381028	0.274569	0.0657389	0.202653	0.335261	0.286219	0.256939	0.243141	0.278267	0.26708	0.0407571	0.832951	> 0.99
	LPA 20:4	C27H55O7P1	522.369	[M - H]-	[C3H6O5P]-	521.35>153	22.32±0.06	0.0444405	0.102066	0.118731	0.0646527	0.0833064	0.0818273	0.082504	0.0240266	0.122542	0.095771	0.113113	0.0472491	0.0454104	0.0477897	0.078646	0.0327888	0.836197	> 0.99
	LPA 20:3	C23H41O7P1	460.259	[M - H]-	[C3H6O5P]-	459.25>153	22.89±0.03	0.741611	0.698111	0.496605	0.907874	0.736789	1.087	0.777999	0.183002	0.565976	0.877949	0.877143	0.834859	0.754014	0.864	0.795657	0.111136	0.857374	> 0.99
	LPA 18:2	C21H39O7P1	434.243	[M - H]-	[C3H6O5P]-	433.25>153	22.89±0.03	0.222007	0.739492	0.92631	0.49787	0.311971	0.57606	0.545619	0.239804	0.677464	0.664261	0.507219	0.492905	0.40001	0.445265	0.531187	0.104671	0.90429	> 0.99
	#1~#6 indicate individual numbers. The unit of measurement is pmol/mg. The q-value was calculated by Student's t-test followed by correction by the Benjamini-Hochberg method. *q < 0.05
