# Supplementary material for: Oleic Acid-Containing Phosphatidylinositol Is a Blood Biomarker Candidate for SPG28
Source: Biomedicines. 2023 Apr 4;11(4):1092. doi: 10.3390/biomedicines11041092 (PMC10136216; doi:10.3390/biomedicines11041092)
Supplement: Supplementary file 1 [file biomedicines-11-01092-s001.zip › Supplementary Table S8_230226.xlsx]

## Sheet: Table 3
	Supplementary Table S8. Results in human sera for PIs significantly changed in Ddhd1(−/−)
	PIs	Formula	Exact Mass	Precursor-ion	Product-ion	MRM transition Quan	Retention time (min)		SPG28		Control 1	Control 2	Control 3	Control 4	Control 5		Rank of SPG28 among all samples	Average of Conrols	±SD of Conrols	95% CI						SPG28 out of 95% CI?
	PI 18:1/20:4*	C47H81O13P1	884.541	[M - H]-	[Acyl FA - H]-	883.55>281.25	17.20±0.01		3.32951		2.60193	1.57721	1.6204	2.32856	0.797168		1	1.78505	0.633863	0.555595	(	1.22946	-	2.34065	)	Yes
	PI 20:1/20:4	C49H85O13P1	912.573	[M - H]-	[Acyl FA - H]-	911.55>303.25	17.10±0.02		0.0963411		0.053398	0.0549347	0.0683711	0.132302	0.0211788		2	0.0660368	0.0365833	0.0320661	(	0.0339707	-	0.0981029	)	No
	PI 18:1/20:3*	C47H83O13P1	886.557	[M - H]-	[Acyl FA - H]-	885.55>281.25	17.17±0.01		0.589192		0.488789	0.253201	0.256507	0.353399	0.123177		1	0.295014	0.121422	0.106429	(	0.188585	-	0.401444	)	Yes
	PI 18:1/22:5*	C49H83O13P1	910.557	[M - H]-	[Acyl FA - H]-	909.55>281.25	17.21±0.01		0.143177		0.133745	0.092815	0.0730204	0.0892409	0.0324796		1	0.0842603	0.0327241	0.0286834	(	0.0555768	-	0.112944	)	Yes
	PI 16:0/20:1	C45H85O13P1	864.573	[M - H]-	[Acyl FA - H]-	863.55>255.25	16.97±0.01		0.0971292		0.066144	0.0585578	0.102339	0.126127	0.017753		3	0.0741841	0.0373739	0.032759	(	0.0414251	-	0.106943	)	No
	PI 18:1/18:1*	C45H83O13P1	862.557	[M - H]-	[Acyl FA - H]-	861.55>281.25	17.04±0.01		2.85384		2.27205	1.8266	2.3275	1.8226	0.665478		1	1.78285	0.597993	0.524155	(	1.25869	-	2.307	)	Yes
	PI 16:0/18:1	C43H81O13P1	836.541	[M - H]-	[Acyl FA - H]-	835.55>255.25	17.06±0.01		6.07842		6.40493	5.2761	7.24681	4.58618	1.84917		3	5.07264	1.85315	1.62433	(	3.44831	-	6.69697	)	No
	PIs are arrangerd in describing order of q valie obtained from lipidome analysis in mice. The unit of measurement is pmol/mg. *PIs that has the highest level in SPG28
