# Supplementary material for: Oleic Acid-Containing Phosphatidylinositol Is a Blood Biomarker Candidate for SPG28
Source: Biomedicines. 2023 Apr 4;11(4):1092. doi: 10.3390/biomedicines11041092 (PMC10136216; doi:10.3390/biomedicines11041092)
Supplement: Supplementary file 1 [file biomedicines-11-01092-s001.zip › Supplementary Table S9_230226.xlsx]

## Sheet: Table 4
	Supplementary Table S9. LPAs in human sera
	PIs	Formula	Exact Mass	Precursor-ion	Product-ion	MRM transition Quan	Retention time (min)		SPG28		Control 1	Control 2	Control 3	Control 4	Control 5		Rank of SPG28 among all samples	Average of Conrols	±SD of Conrols	95% CI						SPG28 out of 95% CI?
	LPA 17:1	C20H39O7P1	422.243	[M - H]-	[C3H6O5P]-	421.25>153	22.41±0.14		0.297431		0.177079	0.127767	0.133466	0.157842	0.136297		1	0.14649	0.0183774	0.0161082	(	0.130382	-	0.162598	)	Yes
	LPA 18:2	C21H39O7P1	434.243	[M - H]-	[C3H6O5P]-	433.25>153	22.49±0.07		0.099337		0.525228	0.581577	0.280635	0.291703	0.780411		6	0.491911	0.188204	0.164965	(	0.326946	-	0.656876	)	No
	LPA 20:4	C23H39O7P1	458.243	[M - H]-	[C3H6O5P]-	457.25>153	22.51±0.06		0.244005		3.06978	3.35083	1.23855	2.1383	2.8345		6	2.52639	0.758822	0.665125	(	1.86127	-	3.19151	)	No
	LPA 20:3	C23H41O7P1	460.259	[M - H]-	[C3H6O5P]-	459.25>153	22.53±0.04		0.0590033		0.177329	0.157025	0.0527773	0.0875802	0.123114		5	0.119565	0.0452463	0.0396594	(	0.0799057	-	0.159224	)	No
	LPA 22:6	C25H39O7P1	482.243	[M - H]-	[C3H6O5P]-	481.25>153	22.57±0.07		0.0624059		0.209415	0.239701	0.127603	0.113716	0.38103		6	0.214293	0.0960224	0.0841658	(	0.130127	-	0.298459	)	No
	Total LPA								0.762183		4.15883	4.4569	1.83303	2.78914	4.25535		6	3.49865	1.02023	0.894257	(	2.60439	-	4.39291	)	No
