# Supplementary material for: Oleic Acid-Containing Phosphatidylinositol Is a Blood Biomarker Candidate for SPG28
Source: Biomedicines. 2023 Apr 4;11(4):1092. doi: 10.3390/biomedicines11041092 (PMC10136216; doi:10.3390/biomedicines11041092)
Supplement: Supplementary file 1 [file biomedicines-11-01092-s001.zip › Supplementary Table S10_230226.xlsx]

## Sheet: Table 4
	Supplementary Table S10. Oleic acid-containing PIs in human sera
	PIs	Formula	Exact Mass	Precursor-ion	Product-ion	MRM transition Quan	Retention time (min)		SPG28		Control 1	Control 2	Control 3	Control 4	Control 5		Rank of SPG28 among all samples	Average of Conrols	±SD of Conrols	95% CI						SPG28 out of 95% CI?
	PI 16:1/18:1	C43H79O13P1	834.526	[M - H]-	[Acyl FA - H]-	833.5>253.2	17.17±0.01		0.373855		0.361663	0.305991	0.251811	0.41484	0.081913		2	0.283244	0.114461	0.100328	(	0.182916	-	0.383571	)	No
	PI 16:0/18:1	C43H81O13P1	836.541	[M - H]-	[Acyl FA - H]-	835.55>255.25	17.06±0.01		6.07842		6.40493	5.2761	7.24681	4.58618	1.84917		3	5.07264	1.85315	1.62433	(	3.44831	-	6.69697	)	No
	PI 17:0/18:1	C44H83O13P1	850.557	[M - H]-	[Acyl FA - H]-	849.55>269.25	17.00±0.01		0.288413		0.316376	0.179351	0.21212	0.211061	0.0951207		2	0.202806	0.070992	0.0622261	(	0.14058	-	0.265032	)	Yes
	PI 18:3/18:1	C45H79O13P1	858.526	[M - H]-	[Acyl FA - H]-	857.5>277.2	17.28±0.02		0.125402		0.0620498	0.0826108	0.0280992	0.0315736	0.0171802		1	0.0443027	0.0242598	0.0212642	(	0.0230385	-	0.065567	)	Yes
	PI 18:1/18:2	C45H81O13P1	860.541	[M - H]-	[Acyl FA - H]-	859.55>279.25	17.17±0.01		3.25114		1.934	2.32771	1.59148	2.18601	0.803069		1	1.76845	0.543656	0.476527	(	1.29193	-	2.24498	)	Yes
	PI 18:1/18:1	C45H83O13P1	862.557	[M - H]-	[Acyl FA - H]-	861.55>281.25	17.04±0.01		2.85384		2.27205	1.8266	2.3275	1.8226	0.665478		1	1.78285	0.597993	0.524155	(	1.25869	-	2.307	)	Yes
	PI 18:0/18:1	C45H85O13P1	864.573	[M - H]-	[Acyl FA - H]-	863.55>281.25	16.95±0.01		11.2254		9.46792	10.0089	9.27576	6.50007	3.16786		1	7.68411	2.56587	2.24905	(	5.43506	-	9.93315	)	Yes
	PI 18:1/20:5	C47H79O13P1	882.526	[M - H]-	[Acyl FA - H]-	881.5>281.25	17.32±0.02		0.107487		0.0713831	0.0915583	0.0443983	0.0361684	0.020006		1	0.0527028	0.0255739	0.0224161	(	0.0302867	-	0.075119	)	Yes
	PI 18:1/20:4	C47H81O13P1	884.541	[M - H]-	[Acyl FA - H]-	883.55>281.25	17.20±0.01		3.32951		2.60193	1.57721	1.6204	2.32856	0.797168		1	1.78505	0.633863	0.555595	(	1.22946	-	2.34065	)	Yes
	PI 18:1/20:3	C47H83O13P1	886.557	[M - H]-	[Acyl FA - H]-	885.55>281.25	17.17±0.01		0.589192		0.488789	0.253201	0.256507	0.353399	0.123177		1	0.295014	0.121422	0.106429	(	0.188585	-	0.401444	)	Yes
	PI 18:1/22:6	C49H81O13P1	908.541	[M - H]-	[Acyl FA - H]-	907.55>281.25	17.30±0.01		0.250199		0.138074	0.131778	0.160843	0.155616	0.0501957		1	0.127301	0.0400203	0.0350787	(	0.0922227	-	0.16238	)	Yes
	PI 18:1/22:5	C49H83O13P1	910.557	[M - H]-	[Acyl FA - H]-	909.55>281.25	17.21±0.01		0.143177		0.133745	0.092815	0.0730204	0.0892409	0.0324796		1	0.0842603	0.0327241	0.0286834	(	0.0555768	-	0.112944	)	Yes
	Total Oleic acid-containing PI								28.616		24.2529	22.1538	23.0887	18.7153	7.70281		1	19.1827	6.0299	5.28534	(	13.8974	-	24.4681	)	Yes
	Total PI								134.087		137.784	142.491	121.821	125.541	66.9873		3	118.925	27.058	23.717	(	95.2078	-	142.642	)	No
